# Supplementary material for: A nonbenzenoid acepleiadylene derivative with small band gap for near-infrared organic phototransistors
Source: Royal Society of Chemistry journal article supplement (doi:10.1039/d3tc01520c), 2023-01-01
Supplement: d3tc01520c1.pdf [file d3tc01520c1.pdf]

## Electronic Supplementary Information

for

### A nonbenzenoid acepleiadylene derivative with small band gap for near-infrared organic phototransistors

Pengcai Liu,<sup>†,a</sup> Lin Fu,<sup>†,a</sup> Xiao-Yu Tang,<sup>a</sup> Rui Xue,<sup>a</sup> Lijuan Zhang,<sup>a</sup> Jiawen Cao,<sup>a</sup> and Xiao-Ye Wang<sup>\*,a</sup>

<sup>a</sup>State Key Laboratory of Elemento-Organic Chemistry, Frontiers Science Center for New Organic Matter, College of Chemistry, Nankai University, Weijin Road 94, Tianjin 300071, China

\*Email: xiaoye.wang@nankai.edu.cn

<sup>†</sup>These authors contributed equally.

#### Table of Contents

|                                                       |    |
|-------------------------------------------------------|----|
| 1. General Methods .....                              | 2  |
| 2. Synthetic Procedure .....                          | 3  |
| 3. TGA Curves of APD-DPP, 1Py-DPP, and 2Py-DPP .....  | 7  |
| 4. Photophysical and Electrochemical Properties ..... | 7  |
| 5. Device Fabrication and Characterizations .....     | 8  |
| 6. Thin-Film Morphologies and Microstructures.....    | 15 |
| 7. Theoretical Calculations .....                     | 16 |
| 8. References.....                                    | 27 |
| 9. NMR Spectra .....                                  | 28 |

## 1. General Methods

All commercial reagents and solvents were used as received without further purification unless otherwise mentioned. Anhydrous toluene, tetrahydrofuran,  $\text{CH}_2\text{Cl}_2$  were obtained from an Ultimate Solvent System 4S (USS-4S). Column chromatography was performed with silica gel (particle size 0.063-0.200 mm) and thin layer chromatography (TLC) was performed on silica gel with GF254 indicator. All yields given refer to isolated yields unless otherwise noted. Nuclear magnetic resonance (NMR) spectra were recorded on an AVANCE 400 MHz Bruker spectrometer. Chemical shifts were reported in ppm. Coupling constants ( $J$  values) were reported in Hertz.  $^1\text{H}$  NMR chemical shifts were referenced to  $\text{CHCl}_3$  (7.260 ppm) and  $\text{DMSO-}d_5$  (2.500 ppm).  $^{13}\text{C}$  NMR chemical shifts were referenced to  $\text{CDCl}_3$  (77.00 ppm) and  $\text{DMSO-}d_6$  (39.52 ppm). The following abbreviations were used for multiplicities: s = singlet, d = doublet, t = triplet, m = multiplet. High-resolution mass spectrometry (HRMS) was performed on a Solarix scimax MRMS by matrix-assisted laser desorption/ionization (MALDI). Absorption spectra were recorded on an Analytikjena Specord 210 Plus UV-Vis spectrophotometer. Photoluminescence spectra were recorded on an Edinburgh FS5 Spectrofluorometer. The electrochemical measurements were carried out in anhydrous THF containing 0.1 M  $n\text{-Bu}_4\text{NPF}_6$  as supporting electrolyte (scan rate:  $100\text{ mV s}^{-1}$ ) under argon atmosphere on a CHI 620E electrochemical analyzer. A three-electrode system with glassy carbon as working electrode,  $\text{Ag}/\text{AgCl}$  as reference electrode, platinum wire as counter electrode was applied. The potential was calibrated against ferrocene/ferrocenium couple. Thermal gravity analyses (TGA) were carried out on a NETZSCH METTLER-TOLEDO TG209 METTLER3+ analyzer. Thin-film X-ray diffraction (XRD) was carried out on a SmartLab9KW X-ray diffractometer at a voltage of 45 kV and a current of 200 mA with the reflection mode using  $\text{Cu } K_\alpha$  radiation ( $\lambda = 1.542\text{ \AA}$ ). Tapping-mode atomic force microscope (AFM) images were recorded using a Bruker Dimensional Icon AFM in air.

## 2. Synthetic Procedure

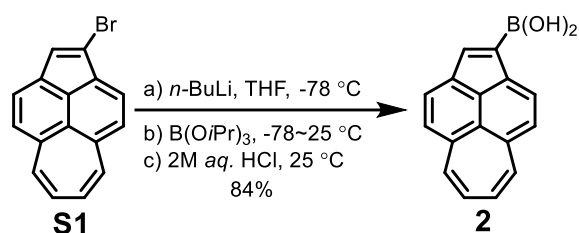

**cyclohepta[fg]acenaphthylen-1-ylboronic acid (2)**. To a Schlenk flask charged with **S1**<sup>1</sup> (579 mg, 2.06 mmol) was added THF (42 mL) under argon. After the solution was cooled to -78 °C, *n*-BuLi (1.5 mL, 2.4 M in hexane) was added and the mixture was stirred for 1 h before B(O*i*Pr)<sub>3</sub> (775 mg, 4.12 mmol) was added dropwise at that temperature. The reaction was allowed to warm up to room temperature and was stirred for another 8 h. After hydrochloric acid (30 mL, 2.0 M) was added, the reaction mixture was stirred for another 2 h and then extracted with ethyl acetate for three times. The combined organic layer was washed with water and brine, and dried over MgSO<sub>4</sub>. After removal of the solvent under reduced pressure, the residue was purified by flash column chromatography over silica gel (eluent: MeOH/CH<sub>2</sub>Cl<sub>2</sub> = 1 : 5) to afford 425 mg (yield: 84%) of **2** as a red solid. <sup>1</sup>H NMR (400 MHz, DMSO-*d*<sub>6</sub>, 298 K, ppm) δ 8.77 (d, *J* = 7.4 Hz, 1H), 8.50 – 8.43 (m, 2H), 8.30 (s, 2H), 8.11 – 8.04 (m, 2H), 7.92 – 7.83 (m, 2H), 7.05 – 6.92 (m, 2H). <sup>13</sup>C NMR (101 MHz, DMSO-*d*<sub>6</sub>, 298 K, ppm) δ 138.21, 138.10, 137.17, 136.84, 136.47, 135.46, 134.42, 127.68, 127.64, 127.53, 127.36, 127.33, 126.83, 126.54, 126.52.

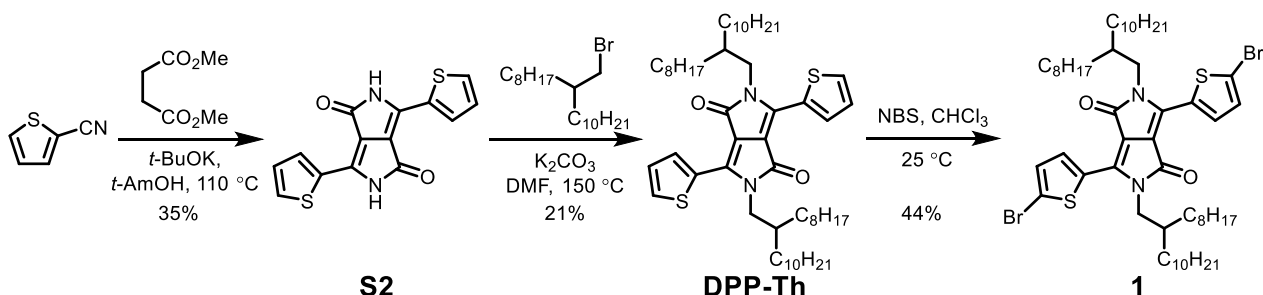

Compound **1** was synthesized following the literature.<sup>2</sup>

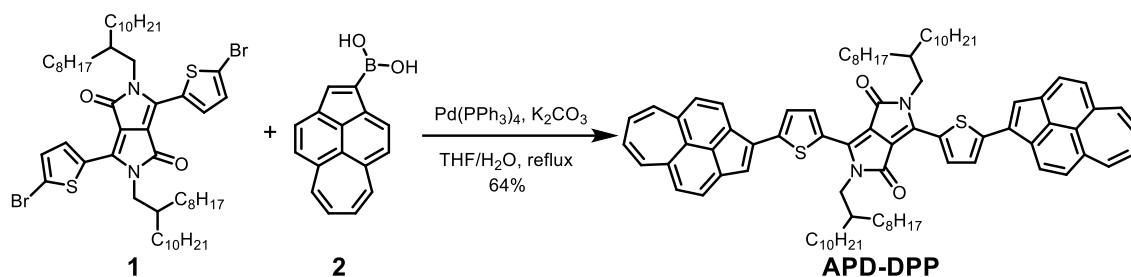

**3,6-bis(5-(cyclohepta[fg]acenaphthylen-1-yl)thiophen-2-yl)-2,5-bis(2-octyldodecyl)-2,5-**

**dihydropyrrolo[3,4-c]pyrrole-1,4-dione (APD-DPP).** To a Schlenk flask charged with **1** (163 mg, 0.160 mmol), **2** (123 mg, 0.500 mmol), Pd(PPh<sub>3</sub>)<sub>4</sub> (23 mg, 0.020 mmol), and K<sub>2</sub>CO<sub>3</sub> (70 mg, 0.50 mmol) was added THF and H<sub>2</sub>O (9 mL + 1 mL) under argon. Then the mixture was heated to reflux for 24 h. After cooled to room temperature and quenched by water, the mixture was extracted with CH<sub>2</sub>Cl<sub>2</sub> for three times. The combined organic layer was washed with water and brine and dried over MgSO<sub>4</sub>. After removal of the solvent under reduced pressure, the residue was purified by column chromatography over silica gel (eluent: hexane/CH<sub>2</sub>Cl<sub>2</sub> = 2 : 1) and further recrystallization from CH<sub>2</sub>Cl<sub>2</sub>/MeOH to afford 129 mg (yield: 64%) of APD-DPP as a black solid. <sup>1</sup>H NMR (400 MHz, CDCl<sub>3</sub>, 298 K, ppm) δ 9.22 (d, *J* = 4.2 Hz, 2H), 8.66 (d, *J* = 7.5 Hz, 2H), 8.29 (d, *J* = 7.5 Hz, 2H), 8.05 (s, 2H), 7.93 (dd, *J* = 16.9, 7.6 Hz, 4H), 7.79 (d, *J* = 4.3 Hz, 2H), 7.74 (d, *J* = 10.8 Hz, 4H), 7.02 – 6.88 (m, 4H), 4.13 (d, *J* = 7.7 Hz, 4H), 2.17 – 2.03 (m, 2H), 1.47 – 1.40 (m, 12H), 1.31 – 1.17 (m, 52H), 0.88 – 0.80 (m, 12H). <sup>13</sup>C NMR (101 MHz, CS<sub>2</sub>/CDCl<sub>3</sub>, 298 K, ppm) δ 161.01, 145.31, 138.91, 138.44, 138.33, 137.31, 137.21, 136.77, 133.36, 131.16, 130.98, 129.00, 127.94, 127.77, 127.43, 127.34, 127.22, 127.12, 126.07, 125.84, 125.61, 122.74, 108.20, 46.08, 38.20, 32.00, 31.32, 30.37, 29.87, 29.80, 29.51, 29.49, 26.51, 22.86, 14.20. HRMS (MALDI) *m/z*: Calcd. for C<sub>86</sub>H<sub>104</sub>N<sub>2</sub>O<sub>2</sub>S<sub>2</sub>, 1261.7539; Found, 1261.7597 [M]<sup>+</sup>.

1Py-DPP and 2Py-DPP were synthesized according to the literature based on a modified procedure.<sup>3</sup> The characterization data are consistent with those in the literature.

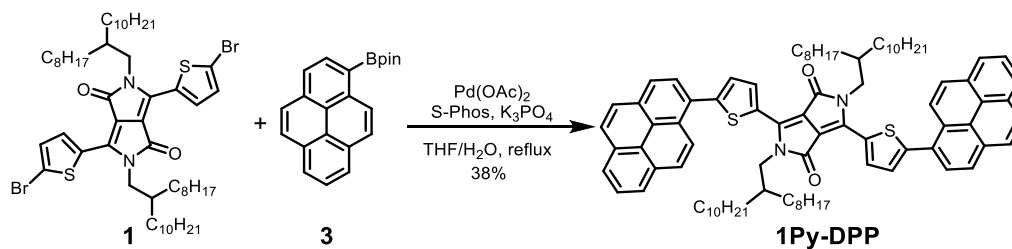

**2,5-bis(2-octyldodecyl)-3,6-bis(5-(pyren-1-yl)thiophen-2-yl)-2,5-dihydropyrrolo[3,4-c]pyrrole-1,4-dione (1Py-DPP).** To a Schlenk flask charged with **1** (153 mg, 0.150 mmol), **3** (148 mg, 0.451 mmol), Pd(OAc)<sub>2</sub> (4.5 mg, 0.020 mmol), S-Phos (16 mg, 0.040 mmol), and K<sub>3</sub>PO<sub>4</sub> (96 mg, 0.45 mmol) was added THF and H<sub>2</sub>O (9 mL + 1 mL) under argon. Then the mixture was heated to reflux for 24 h. After cooled to room temperature and quenched by water, the mixture was extracted with CH<sub>2</sub>Cl<sub>2</sub> for three times. The combined organic layer was washed with water and brine and dried over MgSO<sub>4</sub>. After removal of the solvent under reduced pressure, the residue was purified by column chromatography over silica gel (eluent: hexane/CH<sub>2</sub>Cl<sub>2</sub> = 2 : 1) and further recrystallization from CH<sub>2</sub>Cl<sub>2</sub>/MeOH to afford 72 mg (yield: 38%) of 1Py-DPP as a deep blue solid. <sup>1</sup>H NMR (400 MHz, CDCl<sub>3</sub>, 298 K, ppm) δ 9.20 (d, *J* = 3.9 Hz, 2H), 8.57 (d, *J* = 9.3 Hz, 2H), 8.25 – 8.20 (m, 6H), 8.17 – 8.03 (m, 10H), 7.60 (d, *J* = 4.0 Hz, 2H), 4.15 (d, *J* = 7.7 Hz, 4H), 2.17 – 2.07 (m, 2H), 1.46 – 1.15 (m, 64H), 0.87 – 0.80 (m, 12H). <sup>13</sup>C NMR (101 MHz, CS<sub>2</sub>/CDCl<sub>3</sub>, 298 K, ppm) δ 161.59, 148.34, 139.89, 136.39, 131.57, 131.34, 130.79, 130.35, 129.30, 128.89, 128.53, 128.30, 128.10, 127.23, 126.32, 125.71, 125.37, 125.05, 124.67, 124.60, 124.40, 108.11, 46.33, 38.09, 31.93, 31.92, 31.31, 30.20, 29.73, 29.69, 29.64, 29.39, 26.40, 22.74, 22.72, 14.13.

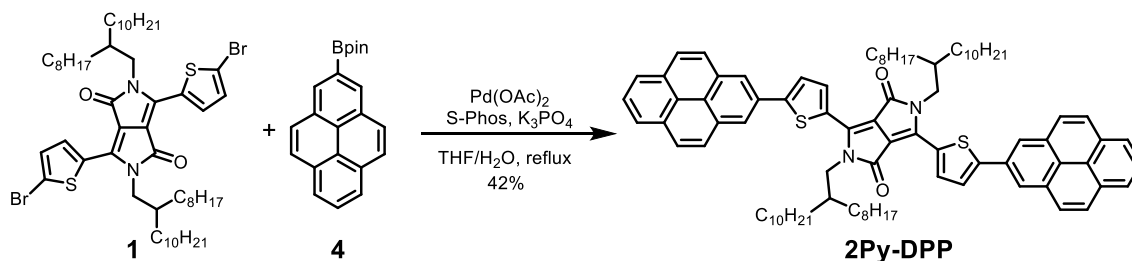

**2,5-bis(2-octyldodecyl)-3,6-bis(5-(pyren-2-yl)thiophen-2-yl)-2,5-dihydropyrrolo[3,4-c]pyrrole-1,4-dione (2Py-DPP).** To a Schlenk flask charged with **1** (153 mg, 0.150 mmol), **4** (148 mg, 0.451 mmol), Pd(OAc)<sub>2</sub> (4.5 mg, 0.020 mmol), S-Phos (16 mg, 0.040 mmol), and K<sub>3</sub>PO<sub>4</sub> (96 mg, 0.45 mmol) was added THF and H<sub>2</sub>O (9 mL + 1 mL) under argon. Then the mixture was heated to reflux for 24 h.

After cooled to room temperature and quenched by water, the mixture was extracted with CH<sub>2</sub>Cl<sub>2</sub> for three times. The combined organic layer was washed with water and brine and dried over MgSO<sub>4</sub>. After removal of the solvent under reduced pressure, the residue was purified by column chromatography over silica gel (eluent: hexane/CH<sub>2</sub>Cl<sub>2</sub> = 2 : 1) and further recrystallization from CH<sub>2</sub>Cl<sub>2</sub>/MeOH to afford 80 mg (yield: 42%) of 2Py-DPP as a deep blue solid. <sup>1</sup>H NMR (400 MHz, CDCl<sub>3</sub>, 298 K, ppm) δ 9.09 (d, *J* = 4.0 Hz, 2H), 8.30 (s, 4H), 8.10 (d, *J* = 7.5 Hz, 4H), 8.05 – 7.96 (m, 8H), 7.93 (t, *J* = 7.6 Hz, 2H), 7.67 (d, *J* = 3.8 Hz, 2H), 4.10 (d, *J* = 7.7 Hz, 4H), 2.10 – 1.98 (m, 2H), 1.50 – 1.16 (m, 64H), 0.87 – 0.80 (m, 12H). <sup>13</sup>C NMR (101 MHz, CS<sub>2</sub>/CDCl<sub>3</sub>, 298 K, ppm) δ 160.78, 149.34, 138.94, 137.04, 131.24, 130.75, 130.22, 129.09, 127.97, 126.91, 125.98, 125.20, 124.53, 124.21, 124.06, 121.59, 107.89, 45.89, 38.06, 31.97, 31.36, 30.36, 29.92, 29.86, 29.80, 29.77, 29.51, 29.47, 26.58, 22.85, 14.19.

### 3. TGA Curves of APD-DPP, 1Py-DPP, and 2Py-DPP

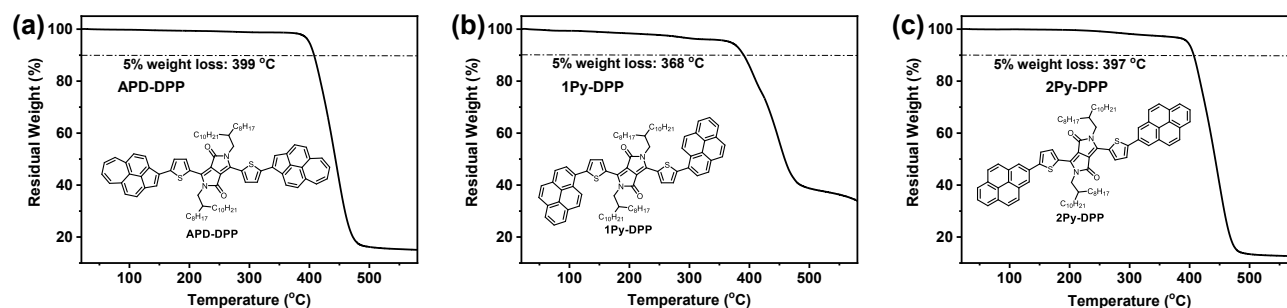

**Figure S1.** TGA curves of (a) APD-DPP (5% loss: 399 °C); (b) 1Py-DPP (5% loss: 368 °C); and (c) 2Py-DPP (5% loss: 397 °C).

### 4. Photophysical and Electrochemical Properties

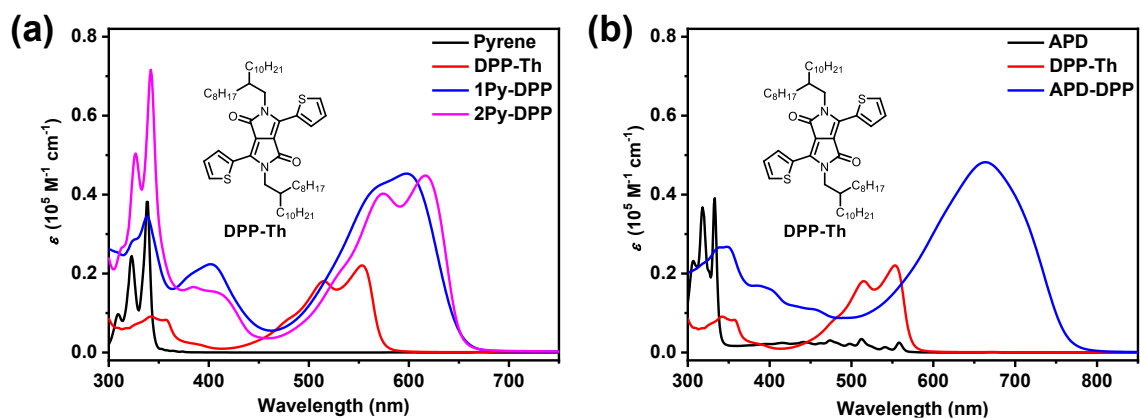

**Figure S2.** UV-Vis absorption spectra of (a) pyrene, DPP-Th, 1Py-DPP, and 2Py-DPP; (b) APD, DPP-Th, and APD-DPP in  $1 \times 10^{-5}$  M toluene solutions.

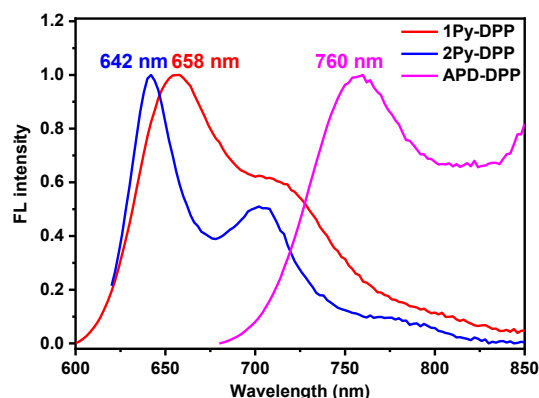

**Figure S3.** Fluorescence spectra of 1Py-DPP (excitation wavelength: 580 nm), 2Py-DPP (excitation wavelength: 610 nm), and APD-DPP (excitation wavelength: 650 nm) in  $1 \times 10^{-6}$  M toluene solutions.

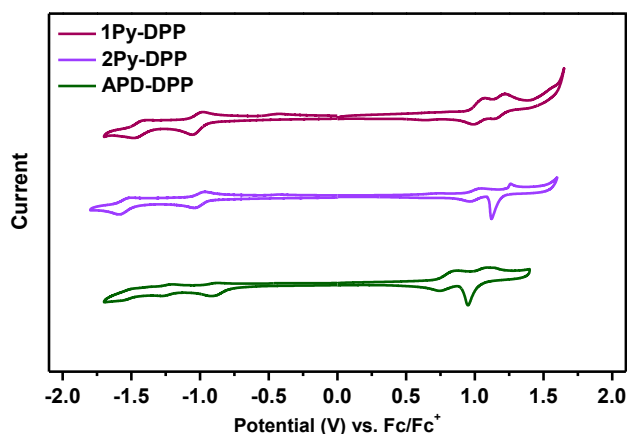

**Figure S4.** Cyclic voltammograms of APD-DPP, 1Py-DPP, and 2Py-DPP in THF with 0.1 M *n*-Bu<sub>4</sub>NPF<sub>6</sub> as supporting electrolyte and ferrocene as an external standard.

**Table S1.** Summary of the photophysical and electrochemical properties.<sup>a</sup>

| Compd.  | $\lambda$ (nm) |         | $\lambda_{\text{onset}}$ (nm) | $E_g^{\text{opt}}$ (eV) | LUMO <sup>CV</sup> (eV) | HOMO <sup>CV</sup> (eV) | $E_g^{\text{CV}}$ (eV) |
|---------|----------------|---------|-------------------------------|-------------------------|-------------------------|-------------------------|------------------------|
|         | Solution       | Film    |                               |                         |                         |                         |                        |
| APD-DPP | 664/384/347    | 765/692 | 780                           | 1.59                    | -4.02                   | -5.53                   | 1.51                   |
| 1Py-DPP | 598/402/338    | 672/613 | 667                           | 1.86                    | -3.85                   | -5.76                   | 1.91                   |
| 2Py-DPP | 617/385/342    | 654/595 | 667                           | 1.86                    | -3.86                   | -5.74                   | 1.88                   |

<sup>a</sup>Definitions:  $E_g^{\text{opt}}$  is the optical energy gap calculated according to the equation  $E_g^{\text{opt}} = 1240/\lambda_{\text{onset}}$ ;  $\lambda_{\text{onset}}$  is taken from the spectra in toluene solutions. The HOMO<sup>CV</sup> and LUMO<sup>CV</sup> energy levels are calculated according to the equations HOMO =  $-(4.80 + E_{\text{ox}}^{\text{onset}})$  and LUMO =  $-(4.80 + E_{\text{red}}^{\text{onset}})$ , where  $E_{\text{ox}}^{\text{onset}}$  and  $E_{\text{red}}^{\text{onset}}$  are the onset potentials of the first oxidative and reductive waves, respectively.  $E_g^{\text{CV}}$  is calculated according to the equation  $E_g^{\text{CV}} = \text{LUMO}^{\text{CV}} - \text{HOMO}^{\text{CV}}$ .

## 5. Device Fabrication and Characterizations

For thin-film transistors, top-contact/bottom-gate (TC/BG) device configuration was adopted. After ultrasonicated in acetone, cleaning reagent, deionized water and isopropanol, n<sup>++</sup>-Si wafers with 300 nm thermally grown silicon dioxide (SiO<sub>2</sub>/Si) were dried with nitrogen airflow and finally treated with oxygen plasma for 15 min. A solution of Al(NO<sub>3</sub>)<sub>3</sub>•9H<sub>2</sub>O in ethanol (0.1 M) was spin-coated onto the cleaned SiO<sub>2</sub>/Si substrate at 5000 rpm for 40 s. The resulting film was baked at 300 °C for 30 min. To form the 12-cyclohexyldodecylphosphonic acid (CDPA) self-assembled monolayers (SAMs), the



AlO<sub>x</sub>/SiO<sub>2</sub>/Si substrate was then immersed in a 0.3 mM solution of CDPA in isopropanol at room temperature for 12 h and then rinsed with isopropanol and dried with nitrogen airflow.<sup>4</sup> The organic semiconductor materials (APD-DPP, 1Py-DPP, and 2Py-DPP) were dissolved at the concentration of 2 mg mL<sup>-1</sup> in trichloroethylene at 60 °C for 1 h. Then the solution was spin-coated on the CDPA-modified AlO<sub>x</sub>/SiO<sub>2</sub>/Si substrates at 1500 rpm for 60 s. The samples were immediately placed on a hotplate for annealing. After annealing at specific temperatures for 30 min, Au (80 nm) was deposited under vacuum ( $4 \times 10^{-4}$  Pa) via the shadow mask method as the top source and drain electrodes. The evaluations of the transistors were carried out on a probe stage using a Keysight B1500A as the parameter analyzer. The carrier mobility ( $\mu$ ) was calculated from the data in the saturated regime according to the equation  $I_{SD} = (W/2L) \mu C_i (V_G - V_T)^2$ , where  $I_{SD}$  is the source-drain current in the saturated regime. The average value and error bar (standard deviation) of carrier mobility at each condition were calculated from 30 devices.  $W$  and  $L$  are the semiconductor channel width and length, respectively ( $W = 1000 \mu\text{m}$  and  $L = 50 \mu\text{m}$ ).  $C_i$  (10 nF cm<sup>-2</sup> for CDPA-modified AlO<sub>x</sub>/SiO<sub>2</sub>/Si) is the capacitance per unit area of the gate dielectric layer.  $V_G$  and  $V_T$  are gate voltage and threshold voltage, respectively.  $V_T$  of the device was determined from the relationship between the square root of  $I_{SD}$  and  $V_G$  at the saturated regime. The OFET performance is shown in Figures S5 – S8 and Table S2.

The NIR detection performance of the original OFET devices is shown in Figure S9 and Table S3. For the optimization of the NIR OPT performance, an electron blocking layer MoO<sub>3</sub> was introduced into the original OFET devices. MoO<sub>3</sub> (10 nm) and Au (80 nm) were deposited sequentially under vacuum ( $4 \times 10^{-4}$  Pa) via the shadow mask method as the electron blocking layer and source/drain electrodes, respectively. To demonstrate the NIR phototransistor application of APD-DPP, we chose the illumination light wavelength by considering the available light sources and the absorption intensity. We have NIR LEDs with adjustable illumination power in our laboratory with wavelengths of 730 nm, 810 nm, and 850 nm. According to the absorption spectrum of APD-DPP in the thin film, it shows significant absorption at 730 nm (around 70% absorbance of the maximum at 765 nm). Therefore, we chose the 730 nm LED light source to prove the NIR phototransistor application of APD-DPP. The light power density was measured by Thorlab PM100D with a Si photodetector. The NIR detection performance of the OPTs with MoO<sub>3</sub> layer is shown in Figure S10 and Table S4.

According to the transfer curves under the dark and light illumination (730 nm), three key parameters of OPTs were obtained based on the following formulas, including photosensitivity ( $P$ ), photoresponsivity ( $R$ ), and specific detectivity ( $D^*$ ).

$$P = \frac{\text{signal}}{\text{noise}} = \frac{I_{\text{ph}}}{I_{\text{dark}}} = \frac{I_{\text{light}} - I_{\text{dark}}}{I_{\text{dark}}}$$

$$R = \frac{I_{\text{ph}}}{P_{\text{opt}}} = \frac{I_{\text{ph}}}{P_{\text{int}}A}$$

$$D^* = \frac{RA^{1/2}}{(2qI_{\text{dark}})^{1/2}}$$

$I_{\text{light}}$  is the drain current under light irradiation;  $I_{\text{dark}}$  is the drain current under dark;  $A$  is the effective light illumination area of the semiconductor layer;  $P_{\text{int}}$  is the incident light power per unit area;  $q$  is the charge of an electron.

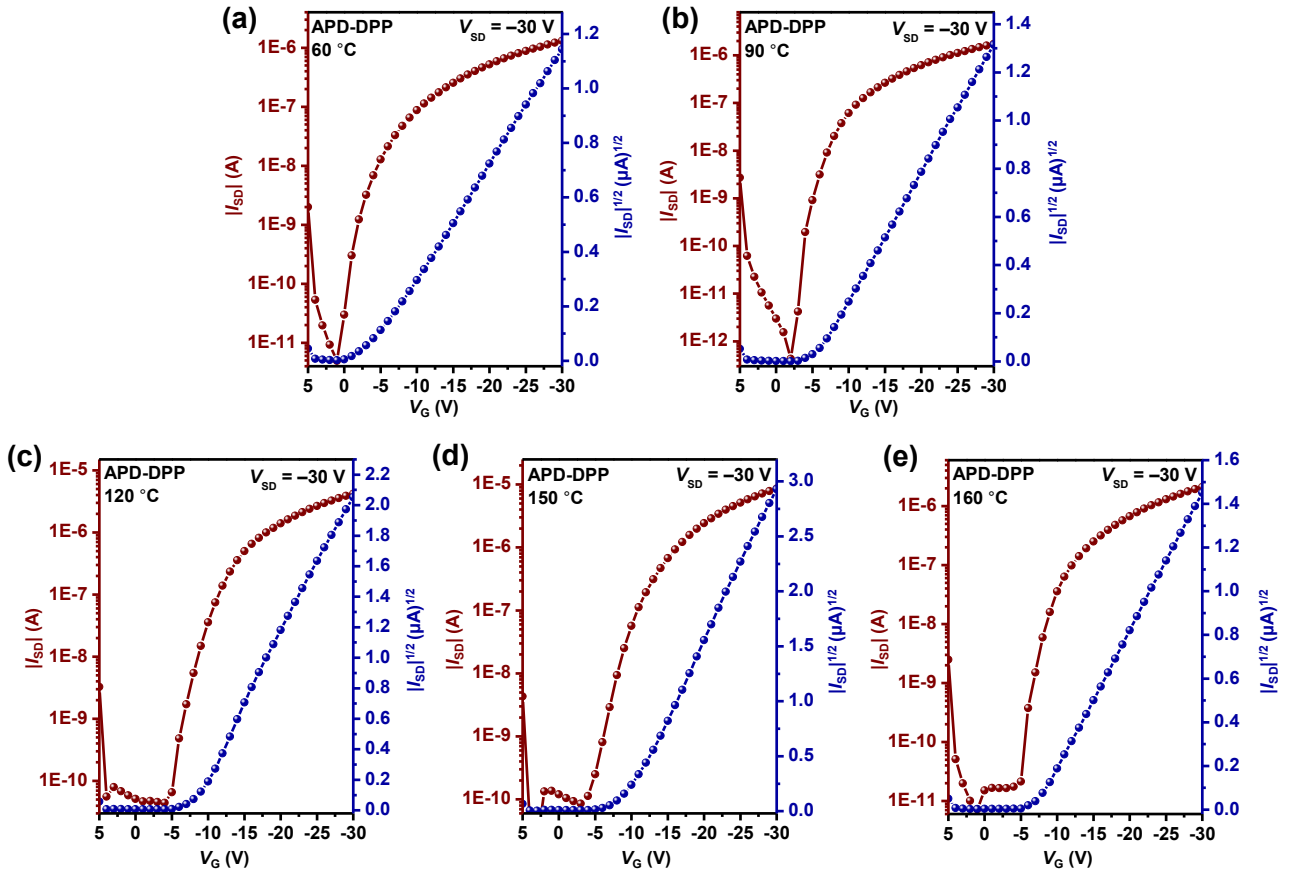

**Figure S5.** Transfer curves of APD-DPP at different annealing temperatures: (a) 60 °C; (b) 90 °C; (c) 120 °C; (d) 150 °C; (e) 160 °C.

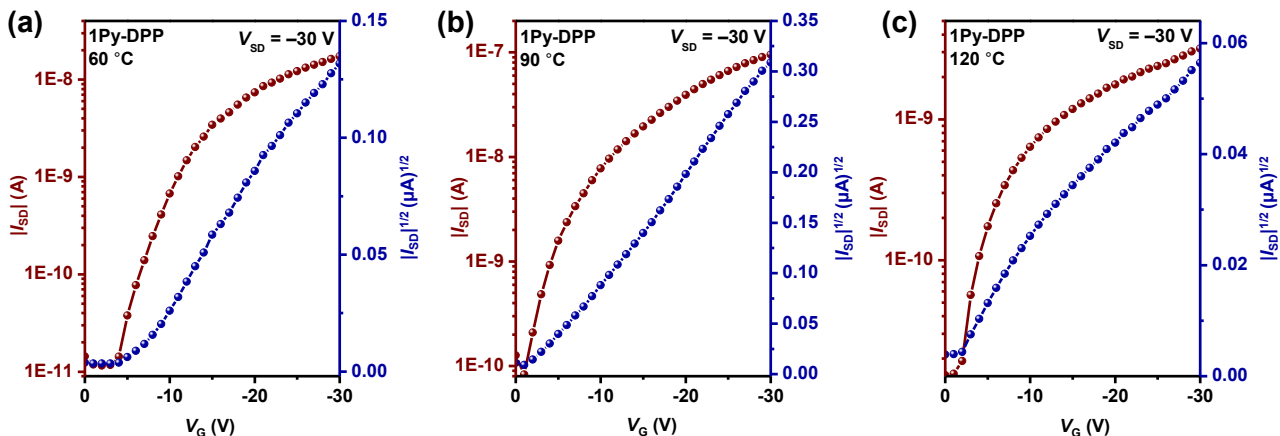

**Figure S6.** Transfer curves of 1Py-DPP at different annealing temperatures: (a) 60 °C; (b) 90 °C; (c) 120 °C.

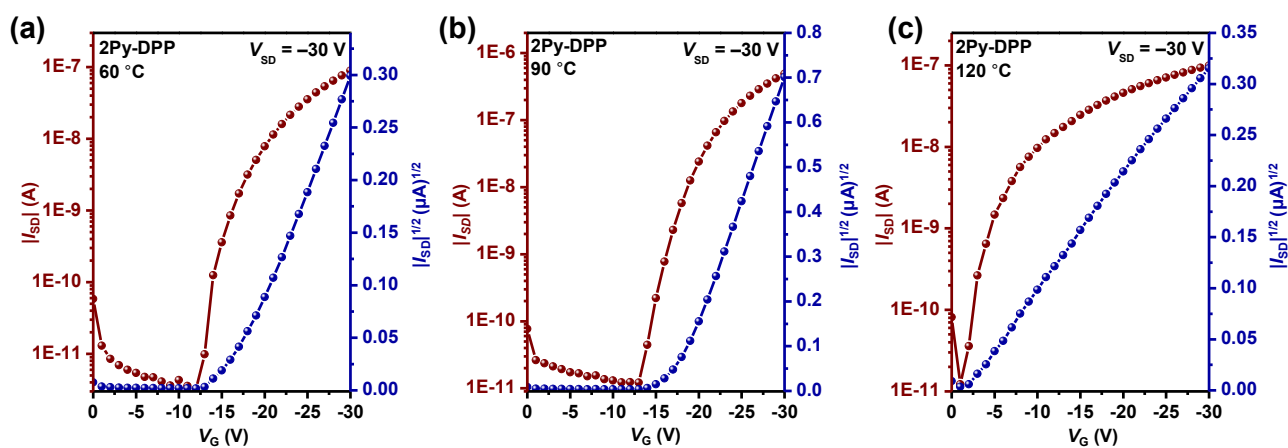

**Figure S7.** Transfer curves of 2Py-DPP at different annealing temperatures: (a) 60 °C; (b) 90 °C; (c) 120 °C.

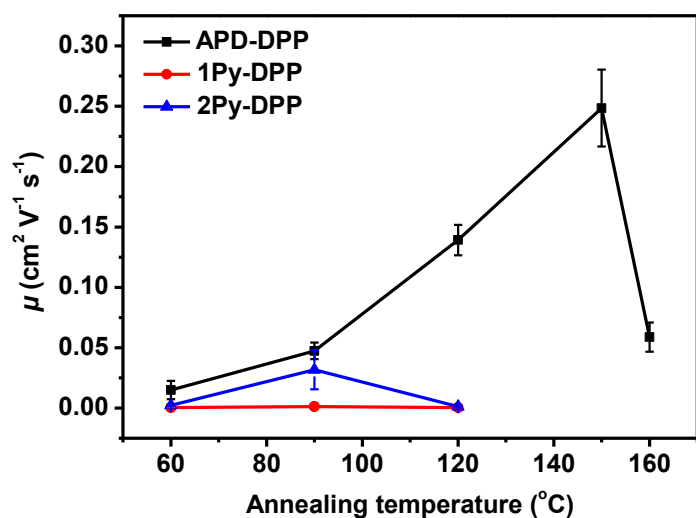

**Figure S8.** Average mobility as a function of the annealing temperature.

**Table S2.** Summary of the OFET performance of thin films annealed at different temperatures.

| Compd.  | $T$ (°C) | $\mu_{\max}$<br>( $\text{cm}^2 \text{V}^{-1} \text{s}^{-1}$ ) | $\mu_{\text{avg}}$<br>( $\text{cm}^2 \text{V}^{-1} \text{s}^{-1}$ ) | $V_T$ (V) | $I_{\text{on}}/I_{\text{off}}$ |
|---------|----------|---------------------------------------------------------------|---------------------------------------------------------------------|-----------|--------------------------------|
| APD-DPP | 60       | $3.60 \times 10^{-2}$                                         | 0.015                                                               | -12.87    | $10^6$                         |
|         | 90       | $5.80 \times 10^{-2}$                                         | 0.047                                                               | -9.90     | $10^6$                         |
|         | 120      | 0.16                                                          | 0.14                                                                | -11.45    | $10^6$                         |
|         | 150      | 0.30                                                          | 0.23                                                                | -8.86     | $10^6$                         |
|         | 160      | $8.32 \times 10^{-2}$                                         | 0.059                                                               | -10.98    | $10^4$                         |
| 1Py-DPP | 60       | $7.49 \times 10^{-4}$                                         | $3.44 \times 10^{-4}$                                               | -8.21     | $10^3$                         |
|         | 90       | $2.60 \times 10^{-3}$                                         | $1.20 \times 10^{-3}$                                               | -7.74     | $10^3$                         |
|         | 120      | $1.00 \times 10^{-3}$                                         | $4.64 \times 10^{-4}$                                               | -11.23    | $10^3$                         |
| 2Py-DPP | 60       | $9.25 \times 10^{-3}$                                         | $2.33 \times 10^{-3}$                                               | -9.71     | $10^5$                         |
|         | 90       | $6.38 \times 10^{-2}$                                         | $3.18 \times 10^{-2}$                                               | -7.29     | $10^5$                         |
|         | 120      | $2.33 \times 10^{-3}$                                         | $1.18 \times 10^{-3}$                                               | -16.4     | $10^4$                         |

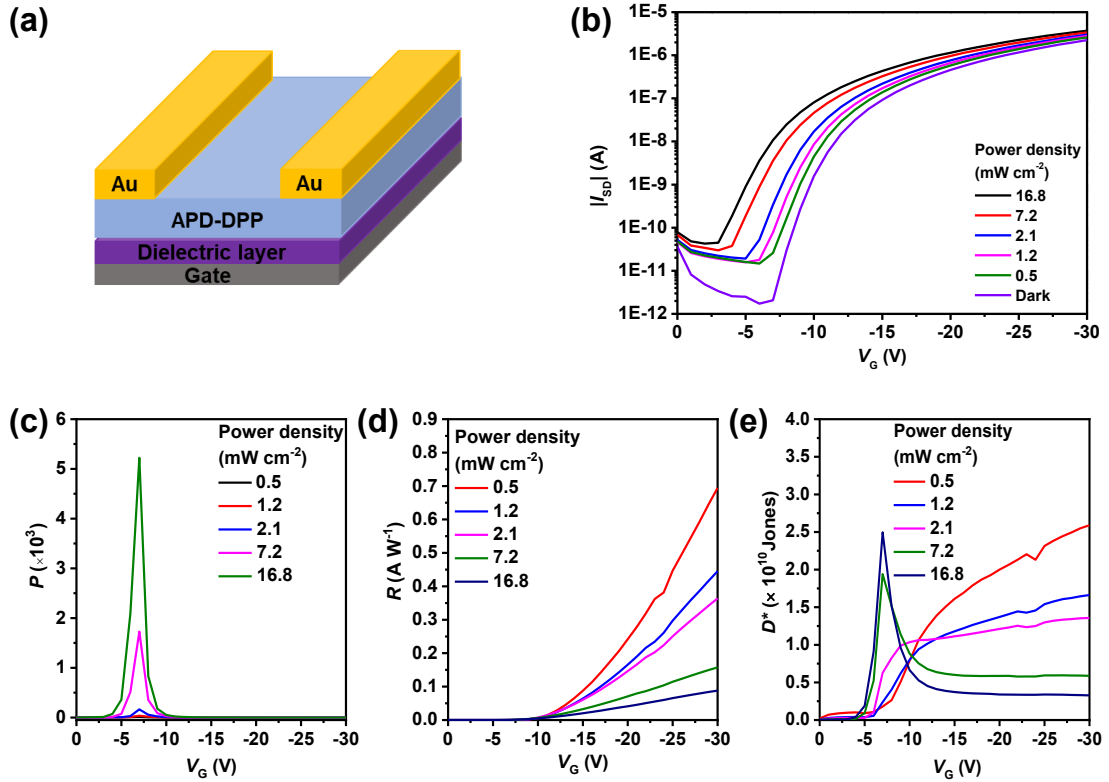

**Figure S9.** (a) Schematic illustration of the APD-DPP-based original OFET device. (b) Transfer characteristics of the original OFET device under NIR light with different power densities. (c-e) Gate-tunable behavior of NIR OPTs without MoO<sub>3</sub> layer under NIR light with different power densities: (c) photosensitivity ( $P$ ); (d) photoresponsivity ( $R$ ); (e) specific detectivity ( $D^*$ ).

**Table S3.** NIR detection performance (the maximum of  $P$ ,  $R$ , and  $D^*$ ) of the original OFET devices under different power densities.

| $P_{\text{int}}$ (mW cm <sup>-2</sup> ) | 0.5                   | 1.2                   | 2.1                   | 7.2                   | 16.8                  |
|-----------------------------------------|-----------------------|-----------------------|-----------------------|-----------------------|-----------------------|
| $P$                                     | $1.16 \times 10^1$    | $3.64 \times 10^1$    | $1.64 \times 10^2$    | $1.73 \times 10^3$    | $5.22 \times 10^3$    |
| $R$ (A W <sup>-1</sup> )                | 0.69                  | 0.45                  | 0.36                  | 0.16                  | 0.09                  |
| $D^*$ (Jones)                           | $2.59 \times 10^{10}$ | $1.66 \times 10^{10}$ | $1.36 \times 10^{10}$ | $1.94 \times 10^{10}$ | $2.50 \times 10^{10}$ |

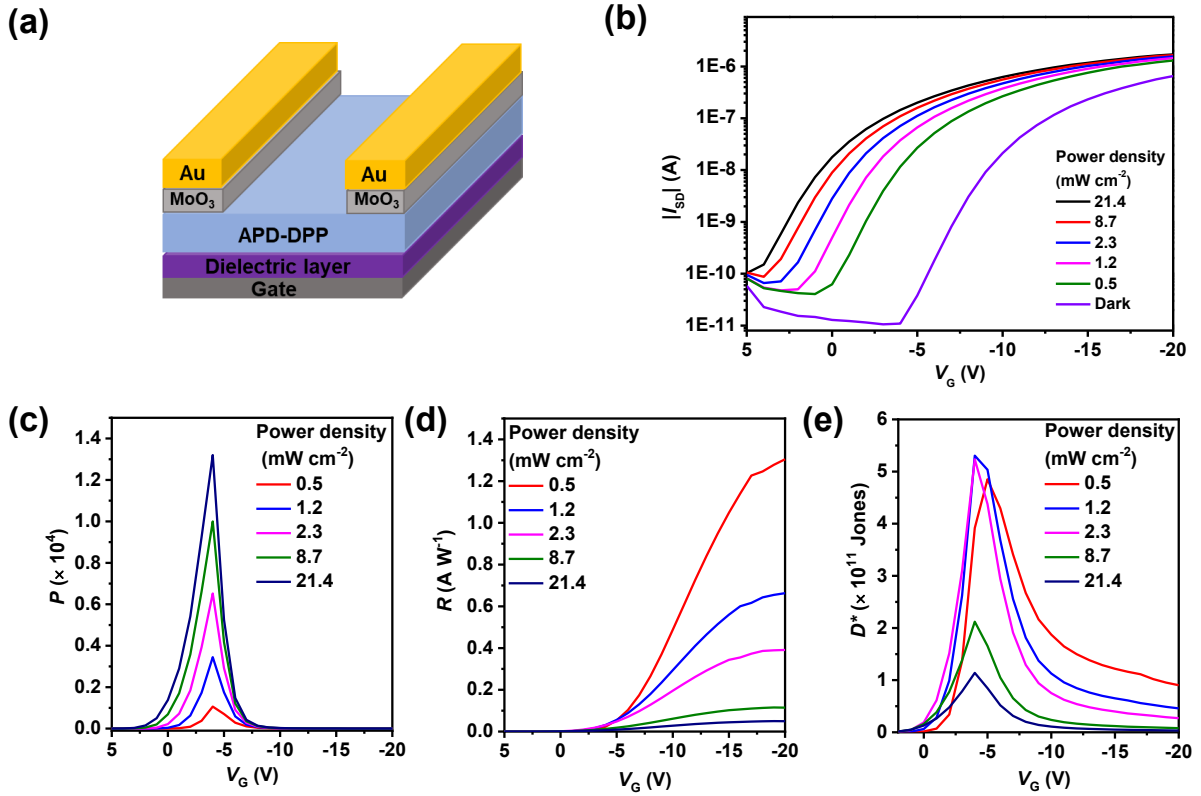

**Figure S10.** (a) Schematic illustration of the APD-DPP-based NIR OPTs with the MoO<sub>3</sub> layer. (b) Transfer characteristics of NIR OPTs with MoO<sub>3</sub> layer under NIR light with different power densities. (c-e) Gate-tunable behavior of NIR OPTs with MoO<sub>3</sub> layer under NIR light with different power densities: (c) photosensitivity ( $P$ ); (d) photoresponsivity ( $R$ ); (e) specific detectivity ( $D^*$ ). Due to the introduction of MoO<sub>3</sub> layer, it is more conducive to hole injection, and the  $V_T$  shifts towards zero, so the  $V_G$  of the device with MoO<sub>3</sub> layer is set as 5 to -20 V during the measurement.

**Table S4.** NIR detection performance (the maximum of  $P$ ,  $R$ , and  $D^*$ ) of NIR OPTs with MoO<sub>3</sub> layer under different power densities.

| $P_{\text{int}}$ (mW cm <sup>-2</sup> ) | 0.5                   | 1.2                   | 2.3                   | 8.7                   | 21.4                  |
|-----------------------------------------|-----------------------|-----------------------|-----------------------|-----------------------|-----------------------|
| $P$                                     | $1.06 \times 10^3$    | $3.45 \times 10^3$    | $6.52 \times 10^3$    | $1.00 \times 10^4$    | $1.32 \times 10^4$    |
| $R$ (A W <sup>-1</sup> )                | 1.30                  | 0.66                  | 0.39                  | 0.11                  | 0.05                  |
| $D^*$ (Jones)                           | $4.85 \times 10^{11}$ | $5.31 \times 10^{11}$ | $5.24 \times 10^{11}$ | $2.12 \times 10^{11}$ | $8.47 \times 10^{10}$ |

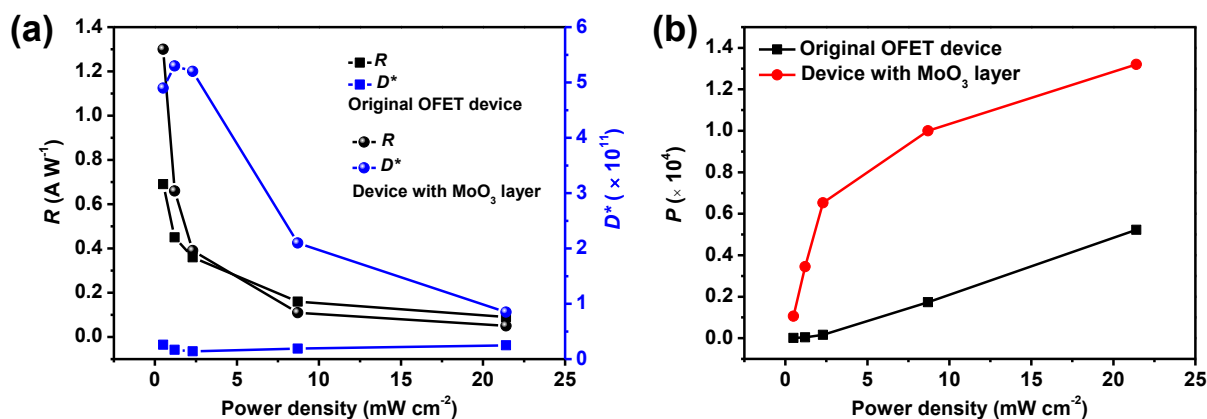

**Figure S11.** Comparison of NIR light detection performance between the original OFET device and the device with MoO<sub>3</sub> layer: (a) photoresponsivity ( $R$ ) and specific detectivity ( $D^*$ ); (b) photosensitivity ( $P$ ). (Test parameters for the original OFET device:  $V_{\text{SD}} = -30$  V,  $V_{\text{G}} = -30$  V for  $R$ ,  $V_{\text{G}} = -7$  V for  $D^*$  and  $P$ . Test parameters for the device with MoO<sub>3</sub> layer:  $V_{\text{SD}} = -20$  V,  $V_{\text{G}} = -20$  V for  $R$ ,  $V_{\text{G}} = -4$  V for  $D^*$  and  $P$ ).

**Table S5.** Comparison of the device performance of organic single-component NIR photodetectors.

| Channel material     | Mobility (cm <sup>2</sup> V <sup>-1</sup> s <sup>-1</sup> ) |                      | Detection region (nm) | $R$ (A W <sup>-1</sup> ) | $P$                   | $D^*$ (Jones)        | Ref. |
|----------------------|-------------------------------------------------------------|----------------------|-----------------------|--------------------------|-----------------------|----------------------|------|
|                      | Hole                                                        | Electron             |                       |                          |                       |                      |      |
| PPhTQ                | 0.09                                                        | 0.06                 | 1186                  | 400                      | NA                    | NA                   | 5    |
| PBIBDF-TT            | 0.02                                                        | NA                   | 808                   | 0.44                     | $3.3 \times 10^4$     | NA                   | 6    |
| PIBDFBTO-HH          | 0.16                                                        | 0.14                 | 940                   | 0.45                     | 100                   | NA                   | 7    |
| pTTDPP-BT            | 0.066                                                       | 0.115                | 450-850               | NA                       | 150                   | NA                   | 8    |
| BODIPY-BF2           | NA                                                          | 0.113                | 760/850/940           | 9450                     | $1.04 \times 10^4$    | NA                   | 9    |
| PIDTT-NDI            | NA                                                          | $4.7 \times 10^{-4}$ | 754                   | 3.19                     | $8.42 \times 10^{-3}$ | NA                   | 10   |
| Y6                   | NA                                                          | 0.032                | 850                   | 0.27                     | 870                   | $5.6 \times 10^{11}$ | 11   |
| DAP-based copolymers | 0.4                                                         | NA                   | 1060                  | 560                      | 1008                  | $1.8 \times 10^{12}$ | 12   |

|               |                    |                       |            |                       |                                      |                                         |                  |
|---------------|--------------------|-----------------------|------------|-----------------------|--------------------------------------|-----------------------------------------|------------------|
| PODTPPD-BT    | $6 \times 10^{-4}$ | NA                    | 905        | $1.25 \times 10^{-5}$ | $6 \times 10^3$                      | NA                                      | 13               |
| PDPP-8OBT     | NA                 | $9.44 \times 10^{-5}$ | 750        | $<10^{-2}$            | 14                                   | NA                                      | 14               |
| PDPP-8OBT-NDI | 0.041              | 0.023                 | 810/905    | 0.001                 | 4                                    | NA                                      | 15               |
| APD-DPP       | <b>0.30</b>        | NA                    | <b>730</b> | <b>1.30</b>           | <b><math>1.34 \times 10^4</math></b> | <b><math>5.31 \times 10^{11}</math></b> | <b>This work</b> |

## 6. Thin-Film Morphologies and Microstructures

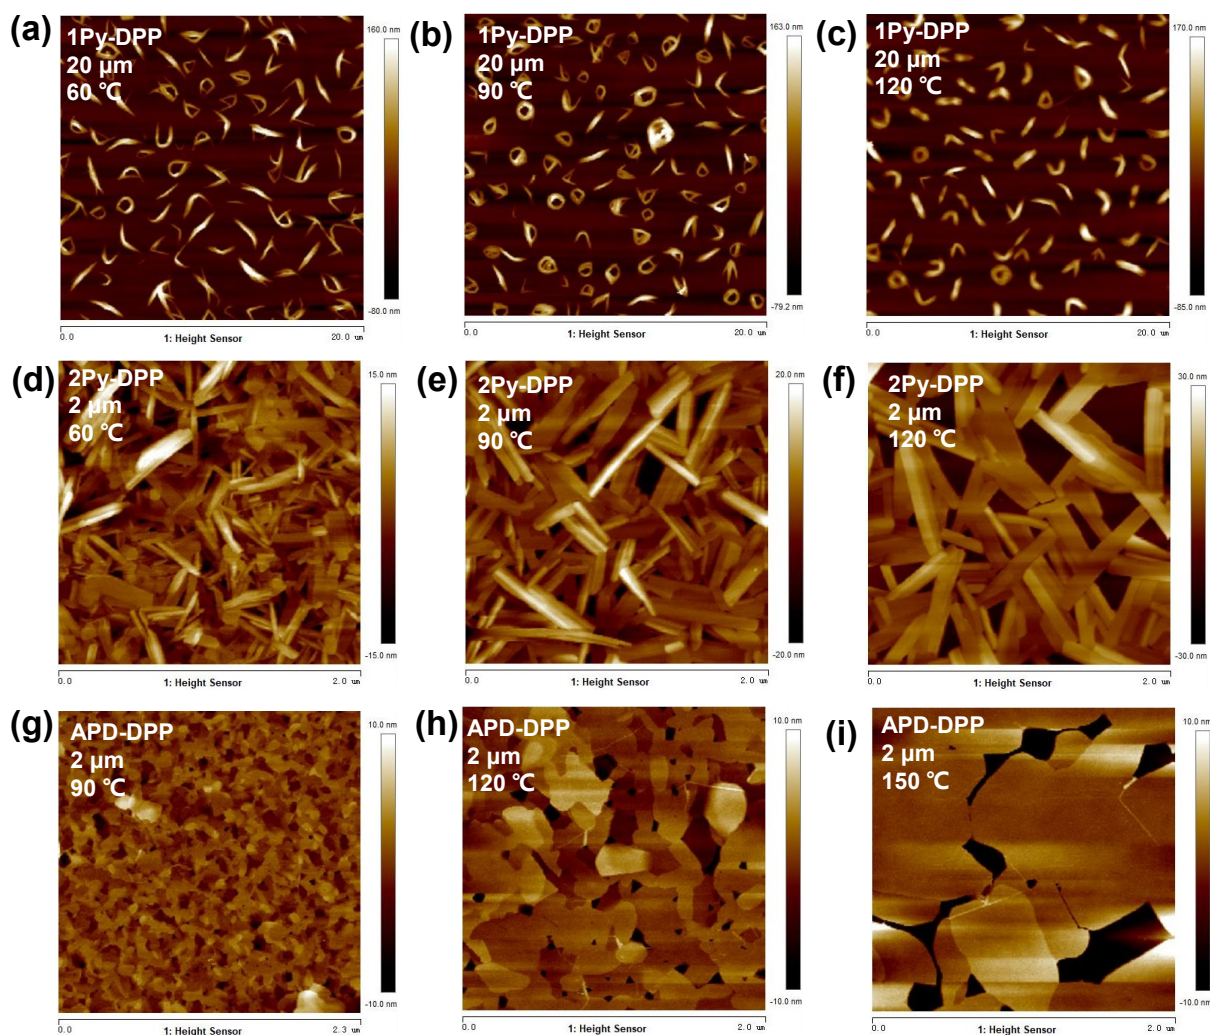

**Figure S12.** AFM height images of 1Py-DPP, 2Py-DPP, and APD-DPP films under different annealing temperatures: (a-c) 1Py-DPP film annealed at (a) 60 °C; (b) 90 °C; and (c) 120 °C; (d-f) 2Py-DPP film annealed at (d) 60 °C; (e) 90 °C; and (f) 120 °C; (g-i) APD-DPP film annealed at (g) 90 °C; (h) 120 °C; and (i) 150 °C.

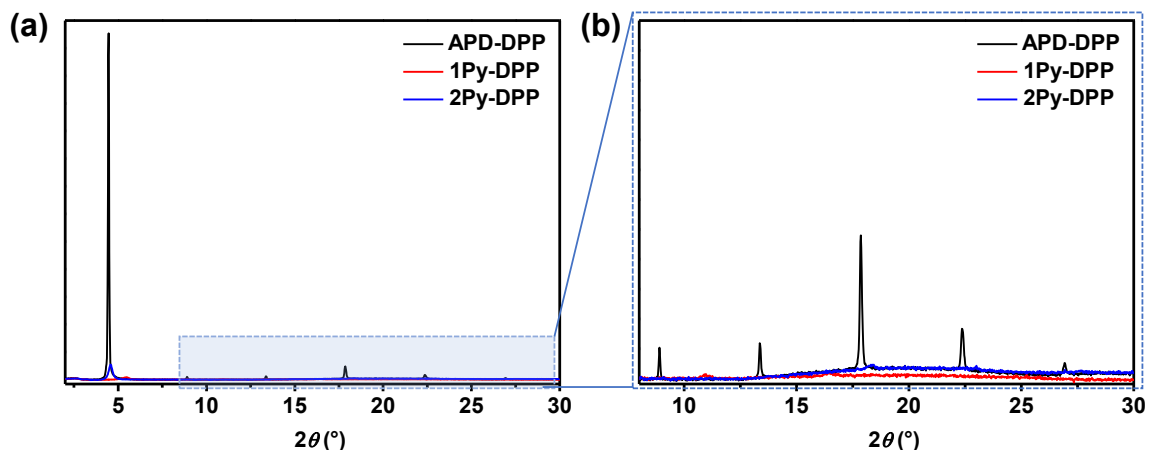

**Figure S13.** (a) XRD patterns of APD-DPP, 1Py-DPP, and 2Py-DPP thin films under the optimized condition (APD-DPP thin film annealed at 150 °C; 1Py-DPP and 2Py-DPP thin films annealed at 90 °C). (b) An enlarged view of the XRD patterns with the  $2\theta$  from 8° to 30°.

## 7. Theoretical Calculations

Theoretical calculations were performed using the Gaussian 09 software package.<sup>16</sup> All calculations were carried out using the density functional theory (DFT) method.<sup>17</sup> The geometries were optimized at the B3LYP/6-311G(d,p) level, and energies were calculated at the same level of theory. Time-dependent DFT (TD-DFT) calculations were performed at the B3LYP/6-311G(d,p) level. Alkyl chains were replaced by methyl groups for computational simplicity.



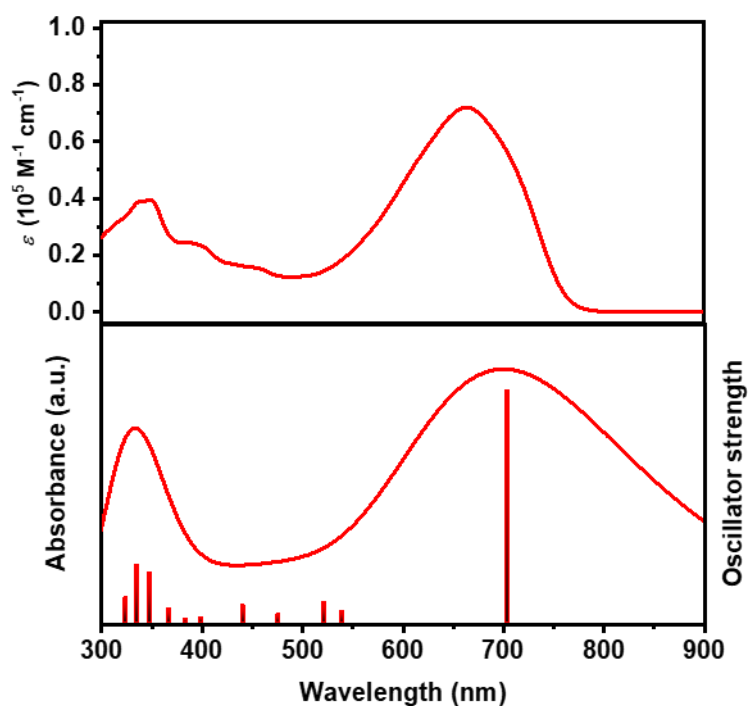

**Figure S14.** The experimental (top) and calculated (bottom) UV-Vis absorption spectra of APD-DPP. The major excitations (oscillator strength  $> 0.05$ ) are shown in the bottom figure as vertical lines.

**Table S6.** Summary of the TD-DFT calculation results of APD-DPP.

| Excited states | Energy (eV) | Wavelength (nm) | Oscillator strength | Major contributions                                                                                                          |
|----------------|-------------|-----------------|---------------------|------------------------------------------------------------------------------------------------------------------------------|
| S1             | 1.7598      | 704.54          | 1.8512              | HOMO→LUMO (99%)                                                                                                              |
| S3             | 2.2954      | 540.14          | 0.0970              | HOMO-1→LUMO+3 (2%)<br>HOMO→LUMO+2 (85%)<br>HOMO→LUMO+4 (4%)                                                                  |
| S5             | 2.3769      | 521.61          | 0.1651              | HOMO-2→LUMO (65%)<br>HOMO-1→LUMO+1 (4%)<br>HOMO→LUMO+2 (7%)<br>HOMO→LUMO+4 (20%)                                             |
| S7             | 2.6013      | 476.62          | 0.0689              | HOMO-4→LUMO (4%)<br>HOMO-2→LUMO (24%)<br>HOMO-2→LUMO+2 (3%)<br>HOMO-1→LUMO+1 (3%)<br>HOMO-1→LUMO+3 (65%)<br>HOMO→LUMO+4 (4%) |
| S10            | 2.8097      | 441.28          | 0.1396              | HOMO-4→LUMO (59%)                                                                                                            |

|     |        |        |        |                     |
|-----|--------|--------|--------|---------------------|
|     |        |        |        | HOMO-3→LUMO+1 (8%)  |
|     |        |        |        | HOMO-2→LUMO+4 (2%)  |
|     |        |        |        | HOMO-1→LUMO+1 (16%) |
|     |        |        |        | HOMO-1→LUMO+3 (4%)  |
|     |        |        |        | HOMO→LUMO+4 (3%)    |
| S13 | 2.9224 | 424.25 | 0.0804 | HOMO-4→LUMO (7%)    |
|     |        |        |        | HOMO-2→LUMO+2 (21%) |
|     |        |        |        | HOMO-2→LUMO+4 (8%)  |
|     |        |        |        | HOMO-1→LUMO+3 (50%) |
|     |        |        |        | HOMO→LUMO+4 (8%)    |

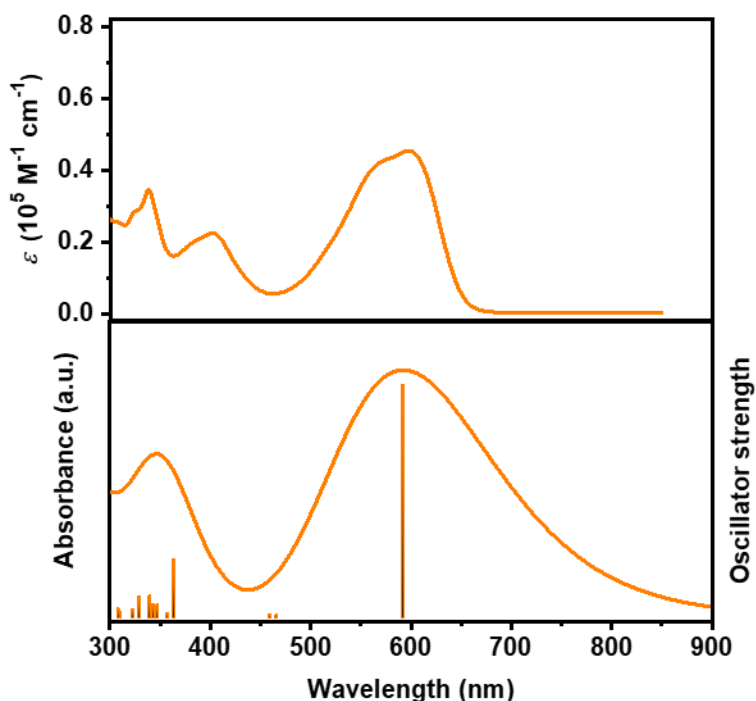

**Figure S15.** The experimental (top) and calculated (bottom) UV-Vis absorption spectra of 1Py-DPP. The major excitations (oscillator strength > 0.05) are shown in the bottom figure as vertical lines.

**Table S7.** Summary of the TD-DFT calculation results of 1Py-DPP.

| Excited States | Energy (eV) | Wavelength (nm) | Oscillator Strength | Major Contributions                    |
|----------------|-------------|-----------------|---------------------|----------------------------------------|
| S1             | 2.0907      | 593.03          | 1.4371              | HOMO→LUMO (99%)                        |
| S3             | 2.6565      | 466.71          | 0.0246              | HOMO-2→LUMO (79%)<br>HOMO→LUMO+2 (20%) |
| S4             | 2.6942      | 460.20          | 0.0255              | HOMO-2→LUMO (38%)<br>HOMO→LUMO+1 (61%) |

|     |        |        |        |                                                                                                                              |
|-----|--------|--------|--------|------------------------------------------------------------------------------------------------------------------------------|
| S8  | 3.4060 | 364.02 | 0.3620 | HOMO-6→LUMO (2%)<br>HOMO-4→LUMO+1 (39%)<br>HOMO-3→LUMO+1 (2%)<br>HOMO-1→LUMO+3 (46%)<br>HOMO→LUMO+4 (5%)                     |
| S10 | 3.4612 | 358.21 | 0.0344 | HOMO-4→LUMO+1 (2%)<br>HOMO-3→LUMO (48%)<br>HOMO-2→LUMO+1 (29%)<br>HOMO-1→LUMO+2 (5%)<br>HOMO→LUMO+3 (6%)<br>HOMO→LUMO+5 (5%) |
| S14 | 3.5637 | 347.90 | 0.0870 | HOMO-4→LUMO (22%)<br>HOMO-2→LUMO+2 (14%)<br>HOMO-1→LUMO+1 (5%)<br>HOMO→LUMO+4 (6%)                                           |
| S15 | 3.6060 | 343.83 | 0.0928 | HOMO-3→LUMO (20%)<br>HOMO-2→LUMO+1 (4%)<br>HOMO-1→LUMO+2 (42%)<br>HOMO→LUMO+3 (7%)<br>HOMO→LUMO+5 (19%)                      |

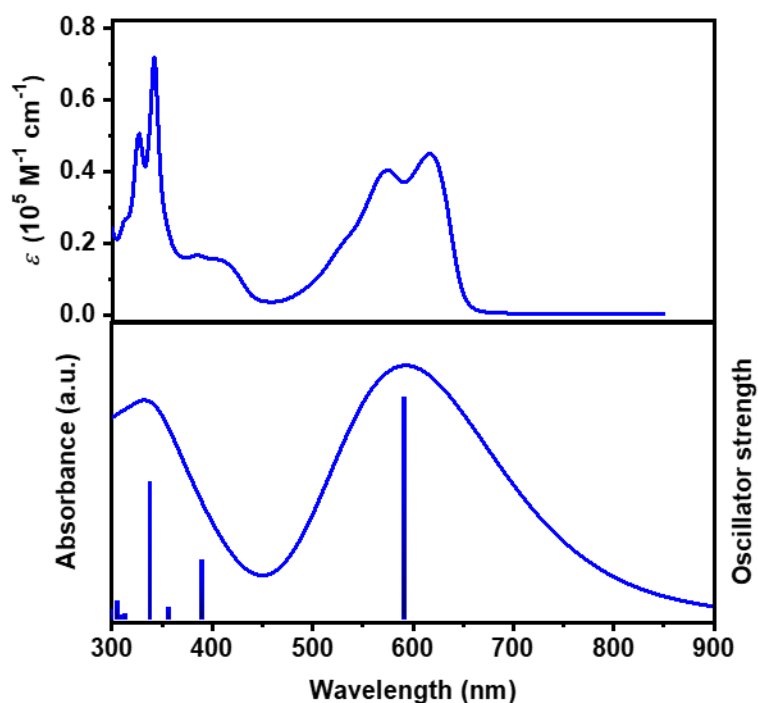

**Figure S16.** The experimental (top) and calculated (bottom) UV-Vis absorption spectra of 2Py-DPP. The major excitations (oscillator strength > 0.05) are shown in the bottom figure as vertical lines.

**Table S8.** Summary of the TD-DFT calculation results of 2Py-DPP.

| Excited States | Energy (eV) | Wavelength (nm) | Oscillator Strength | Major Contributions                                                                                         |
|----------------|-------------|-----------------|---------------------|-------------------------------------------------------------------------------------------------------------|
| S1             | 2.0916      | 592.77          | 1.6429              | HOMO→LUMO (98%)                                                                                             |
| S7             | 3.1805      | 389.83          | 0.4437              | HOMO-4→LUMO (86%)<br>HOMO→LUMO+4 (11%)                                                                      |
| S10            | 3.4719      | 357.11          | 0.0859              | HOMO-4→LUMO (10%)<br>HOMO-2→LUMO+2 (5%)<br>HOMO-1→LUMO+1 (5%)<br>HOMO→LUMO+4 (76%)                          |
| S15            | 3.6608      | 338.68          | 1.0206              | HOMO-4→LUMO+4 (2%)<br>HOMO-3→LUMO+3 (4%)<br>HOMO-2→LUMO+2 (36%)<br>HOMO-1→LUMO+1 (36%)<br>HOMO→LUMO+4 (10%) |

**Cartesian coordinates obtained in gas-phase DFT calculations**

| APD-DPP |        |           |           |           |
|---------|--------|-----------|-----------|-----------|
| Tag     | Symbol | X         | Y         | Z         |
| 1       | C      | 3.078580  | -0.214915 | -0.287541 |
| 2       | C      | 0.610091  | 0.361836  | -0.290886 |
| 3       | C      | -0.610097 | -0.362037 | -0.290961 |
| 4       | C      | -1.681394 | 0.534657  | -0.290093 |
| 5       | N      | -1.129492 | 1.814516  | -0.290185 |
| 6       | C      | 0.303333  | 1.772185  | -0.291673 |
| 7       | C      | 1.681394  | -0.534835 | -0.289471 |
| 8       | N      | 1.129507  | -1.814709 | -0.289347 |
| 9       | C      | -0.303313 | -1.772385 | -0.291219 |
| 10      | C      | -3.078585 | 0.214769  | -0.288260 |
| 11      | O      | 0.994144  | 2.783759  | -0.294376 |
| 12      | O      | -0.994118 | -2.783966 | -0.293693 |
| 13      | C      | 1.810446  | -3.098501 | -0.290663 |
| 14      | C      | -1.810457 | 3.098292  | -0.293161 |
| 15      | C      | 10.052006 | -2.422571 | -0.981669 |
| 16      | C      | 11.353840 | -2.014217 | -0.684094 |
| 17      | C      | 11.680389 | -0.788217 | -0.065006 |

|    |   |            |           |           |
|----|---|------------|-----------|-----------|
| 18 | C | 10.595710  | 0.115449  | 0.284358  |
| 19 | C | 9.314506   | -0.324842 | -0.045260 |
| 20 | C | 9.001954   | -1.573667 | -0.660341 |
| 21 | C | 10.665620  | 1.410306  | 0.936256  |
| 22 | C | 9.457063   | 2.088293  | 1.193445  |
| 23 | C | 8.191660   | 1.602472  | 0.847863  |
| 24 | C | 8.103487   | 0.382625  | 0.197291  |
| 25 | C | 7.578067   | -1.627893 | -0.799939 |
| 26 | C | 7.016342   | -0.457224 | -0.298243 |
| 27 | C | 13.077823  | -0.551605 | 0.161041  |
| 28 | C | 11.865637  | 2.078982  | 1.359952  |
| 29 | C | 13.723762  | 0.507079  | 0.729058  |
| 30 | C | 13.172596  | 1.701618  | 1.273779  |
| 31 | C | -3.598431  | -1.074483 | -0.295975 |
| 32 | C | -5.002007  | -1.119391 | -0.288806 |
| 33 | C | -5.609977  | 0.124375  | -0.277699 |
| 34 | S | -4.397753  | 1.383463  | -0.259832 |
| 35 | C | 3.598352   | 1.074359  | -0.295022 |
| 36 | C | 5.001935   | 1.119351  | -0.288020 |
| 37 | C | 5.609951   | -0.124390 | -0.277365 |
| 38 | S | 4.397830   | -1.383549 | -0.259677 |
| 39 | C | -10.051904 | 2.423248  | -0.980390 |
| 40 | C | -11.353741 | 2.014869  | -0.682895 |
| 41 | C | -11.680341 | 0.788585  | -0.064385 |
| 42 | C | -10.595709 | -0.115348 | 0.284438  |
| 43 | C | -9.314495  | 0.324985  | -0.045079 |
| 44 | C | -9.001891  | 1.574088  | -0.659580 |
| 45 | C | -10.665687 | -1.410515 | 0.935708  |
| 46 | C | -9.457166  | -2.088733 | 1.192456  |
| 47 | C | -8.191749  | -1.602857 | 0.846998  |
| 48 | C | -8.103515  | -0.382701 | 0.197015  |
| 49 | C | -7.578046  | 1.628279  | -0.799273 |
| 50 | C | -7.016335  | 0.457303  | -0.298237 |
| 51 | C | -13.077770 | 0.551983  | 0.161672  |
| 52 | C | -11.865720 | -2.079291 | 1.359197  |
| 53 | C | -13.723758 | -0.506915 | 0.729238  |
| 54 | C | -13.172653 | -1.701769 | 1.273331  |
| 55 | H | 2.428725   | -3.222362 | -1.182425 |
| 56 | H | 2.426034   | -3.226066 | 0.602444  |
| 57 | H | 1.029774   | -3.858666 | -0.293272 |
| 58 | H | -1.029813  | 3.858479  | -0.296779 |

|    |   |            |           |           |
|----|---|------------|-----------|-----------|
| 59 | H | -2.428780  | 3.220915  | -1.185062 |
| 60 | H | -2.426014  | 3.227058  | 0.599800  |
| 61 | H | 9.882872   | -3.386224 | -1.450327 |
| 62 | H | 12.173690  | -2.677215 | -0.937176 |
| 63 | H | 9.519542   | 3.047270  | 1.695509  |
| 64 | H | 7.314136   | 2.183083  | 1.105564  |
| 65 | H | 7.026960   | -2.438519 | -1.257094 |
| 66 | H | 13.718944  | -1.358356 | -0.183066 |
| 67 | H | 11.687425  | 3.044828  | 1.824098  |
| 68 | H | 14.805976  | 0.431987  | 0.776077  |
| 69 | H | 13.896019  | 2.404559  | 1.675988  |
| 70 | H | -2.958561  | -1.948405 | -0.316106 |
| 71 | H | -5.561647  | -2.042752 | -0.336411 |
| 72 | H | 2.958431   | 1.948250  | -0.314961 |
| 73 | H | 5.561530   | 2.042749  | -0.335460 |
| 74 | H | -9.882710  | 3.387121  | -1.448575 |
| 75 | H | -12.173562 | 2.678061  | -0.935564 |
| 76 | H | -9.519673  | -3.047950 | 1.694058  |
| 77 | H | -7.314277  | -2.183709 | 1.104332  |
| 78 | H | -7.026920  | 2.439106  | -1.256053 |
| 79 | H | -13.718852 | 1.358959  | -0.181982 |
| 80 | H | -11.687542 | -3.045374 | 1.822862  |
| 81 | H | -14.805960 | -0.431743 | 0.776393  |
| 82 | H | -13.896105 | -2.404836 | 1.675267  |

| 1Py-DPP |        |           |           |           |
|---------|--------|-----------|-----------|-----------|
| Tag     | Symbol | X         | Y         | Z         |
| 1       | C      | -3.058950 | -0.422189 | -0.642308 |
| 2       | C      | -0.523932 | -0.479746 | -0.653994 |
| 3       | C      | 0.523866  | 0.479188  | -0.654177 |
| 4       | C      | 1.753379  | -0.179461 | -0.647544 |
| 5       | N      | 1.477112  | -1.544712 | -0.647142 |
| 6       | C      | 0.064775  | -1.797350 | -0.650673 |
| 7       | C      | -1.753441 | 0.178912  | -0.647770 |
| 8       | N      | -1.477166 | 1.544161  | -0.647983 |
| 9       | C      | -0.064837 | 1.796798  | -0.651561 |
| 10      | C      | 3.058877  | 0.421674  | -0.642298 |
| 11      | O      | -0.403370 | -2.928658 | -0.652716 |

|    |   |            |           |           |
|----|---|------------|-----------|-----------|
| 12 | O | 0.403319   | 2.928101  | -0.654087 |
| 13 | C | -2.406756  | 2.661394  | -0.661643 |
| 14 | C | 2.406683   | -2.661969 | -0.659963 |
| 15 | C | -6.988195  | -1.035956 | -0.665558 |
| 16 | C | 3.303881   | 1.787111  | -0.650828 |
| 17 | C | 4.673982   | 2.113934  | -0.633431 |
| 18 | C | 5.516994   | 1.023837  | -0.597656 |
| 19 | S | 4.586783   | -0.454743 | -0.612965 |
| 20 | C | -3.303961  | -1.787626 | -0.650250 |
| 21 | C | -4.674060  | -2.114448 | -0.632644 |
| 22 | C | -5.517082  | -1.024358 | -0.597224 |
| 23 | S | -4.586856  | 0.454255  | -0.613155 |
| 24 | C | 6.988113   | 1.035497  | -0.666059 |
| 25 | C | 7.825214   | 0.328835  | 0.236737  |
| 26 | C | 9.243513   | 0.379382  | 0.054128  |
| 27 | C | 9.808001   | 1.149513  | -1.005399 |
| 28 | C | 8.949686   | 1.862606  | -1.853163 |
| 29 | C | 7.575942   | 1.801260  | -1.685759 |
| 30 | C | 10.108936  | -0.334716 | 0.937571  |
| 31 | C | 9.567560   | -1.086741 | 2.020275  |
| 32 | C | 10.434664  | -1.784866 | 2.874173  |
| 33 | C | 11.810724  | -1.748760 | 2.673413  |
| 34 | C | 12.351015  | -1.012797 | 1.622939  |
| 35 | C | 11.522969  | -0.296990 | 0.745731  |
| 36 | C | 12.052244  | 0.478340  | -0.339738 |
| 37 | C | 11.232662  | 1.171483  | -1.172752 |
| 38 | C | 7.320014   | -0.409609 | 1.361936  |
| 39 | C | 8.146904   | -1.082780 | 2.205480  |
| 40 | C | -7.825197  | -0.328718 | 0.236878  |
| 41 | C | -9.243505  | -0.379232 | 0.054357  |
| 42 | C | -9.808113  | -1.149892 | -1.004721 |
| 43 | C | -8.949902  | -1.863552 | -1.852112 |
| 44 | C | -7.576144  | -1.802247 | -1.684793 |
| 45 | C | -10.108831 | 0.335423  | 0.937448  |
| 46 | C | -9.567342  | 1.087983  | 2.019720  |
| 47 | C | -10.434342 | 1.786635  | 2.873293  |
| 48 | C | -11.810416 | 1.750532  | 2.672622  |
| 49 | C | -12.350818 | 1.014052  | 1.622565  |
| 50 | C | -11.522876 | 0.297711  | 0.745698  |
| 51 | C | -7.319881  | 0.410281  | 1.361664  |
| 52 | C | -8.146676  | 1.083991  | 2.204871  |

|    |   |            |           |           |
|----|---|------------|-----------|-----------|
| 53 | C | -12.052272 | -0.478155 | -0.339334 |
| 54 | C | -11.232786 | -1.171818 | -1.172008 |
| 55 | H | -3.042836  | 2.641190  | -1.549176 |
| 56 | H | -3.030089  | 2.675701  | 0.235047  |
| 57 | H | -1.798432  | 3.565154  | -0.682462 |
| 58 | H | 1.798336   | -3.565732 | -0.680002 |
| 59 | H | 3.042699   | -2.642521 | -1.547561 |
| 60 | H | 3.030082   | -2.675543 | 0.236690  |
| 61 | H | 2.500740   | 2.514054  | -0.660044 |
| 62 | H | 5.044244   | 3.130809  | -0.625854 |
| 63 | H | -2.500837  | -2.514591 | -0.659202 |
| 64 | H | -5.044270  | -3.131339 | -0.624636 |
| 65 | H | 9.368912   | 2.453033  | -2.660799 |
| 66 | H | 6.929174   | 2.330659  | -2.375322 |
| 67 | H | 10.019081  | -2.355028 | 3.698181  |
| 68 | H | 12.467170  | -2.294752 | 3.341538  |
| 69 | H | 13.425294  | -0.985590 | 1.474525  |
| 70 | H | 13.127688  | 0.503578  | -0.480611 |
| 71 | H | 11.645396  | 1.758516  | -1.986421 |
| 72 | H | 6.254893   | -0.414706 | 1.548394  |
| 73 | H | 7.734411   | -1.625555 | 3.049615  |
| 74 | H | -9.369209  | -2.454387 | -2.659407 |
| 75 | H | -6.929477  | -2.332106 | -2.374096 |
| 76 | H | -10.018670 | 2.357199  | 3.696977  |
| 77 | H | -12.466787 | 2.296929  | 3.340490  |
| 78 | H | -13.425106 | 0.986851  | 1.474221  |
| 79 | H | -6.254753  | 0.415367  | 1.548087  |
| 80 | H | -7.734105  | 1.627189  | 3.048695  |
| 81 | H | -13.127724 | -0.503371 | -0.480146 |
| 82 | H | -11.645596 | -1.759246 | -1.985353 |

2Py-DPP

| Tag | Symbol | X         | Y         | Z         |
|-----|--------|-----------|-----------|-----------|
| 1   | C      | 0.565505  | -0.428468 | -0.216201 |
| 2   | C      | -0.565502 | 0.428947  | -0.216201 |
| 3   | C      | -1.728981 | -0.340175 | -0.202537 |
| 4   | N      | -1.328409 | -1.673447 | -0.201738 |
| 5   | C      | 0.101439  | -1.795811 | -0.211149 |
| 6   | C      | 1.728978  | 0.340631  | -0.201907 |
| 7   | N      | 1.328410  | 1.673909  | -0.200647 |



|    |   |            |           |           |
|----|---|------------|-----------|-----------|
| 8  | C | -0.101434  | 1.796288  | -0.210507 |
| 9  | O | 0.669045   | -2.878764 | -0.217767 |
| 10 | O | -0.669024  | 2.879251  | -0.216859 |
| 11 | C | 3.082006   | -0.139945 | -0.182276 |
| 12 | C | -3.082031  | 0.140336  | -0.182958 |
| 13 | C | 3.449201   | -1.478009 | -0.204618 |
| 14 | C | -3.449339  | 1.478368  | -0.205239 |
| 15 | C | -4.839856  | 1.681954  | -0.162453 |
| 16 | C | -5.579355  | 0.518750  | -0.106216 |
| 17 | S | -4.522620  | -0.868864 | -0.096036 |
| 18 | C | 4.839703   | -1.681727 | -0.161964 |
| 19 | C | 5.579295   | -0.518581 | -0.105771 |
| 20 | S | 4.522720   | 0.869128  | -0.095751 |
| 21 | C | 7.035144   | -0.364559 | -0.042595 |
| 22 | C | -7.035176  | 0.364600  | -0.042933 |
| 23 | C | -2.147890  | -2.872922 | -0.210527 |
| 24 | C | 2.147882   | 2.873382  | -0.208395 |
| 25 | C | 7.817634   | -1.372408 | 0.540853  |
| 26 | C | 9.209156   | -1.265404 | 0.616975  |
| 27 | C | 9.848784   | -0.101754 | 0.097861  |
| 28 | C | 9.060323   | 0.927871  | -0.493408 |
| 29 | C | 7.671784   | 0.775051  | -0.554869 |
| 30 | C | -7.817754  | 1.372606  | 0.540132  |
| 31 | C | -9.209258  | 1.265477  | 0.616394  |
| 32 | C | -9.848790  | 0.101529  | 0.097830  |
| 33 | C | -9.060248  | -0.928256 | -0.493051 |
| 34 | C | -7.671734  | -0.775300 | -0.554676 |
| 35 | C | -11.263154 | -0.032861 | 0.173432  |
| 36 | C | -12.046958 | 0.997818  | 0.771303  |
| 37 | C | -13.438338 | 0.841676  | 0.835550  |
| 38 | C | -14.050339 | -0.299248 | 0.325085  |
| 39 | C | -13.292571 | -1.309013 | -0.260140 |
| 40 | C | -11.897870 | -1.198858 | -0.347616 |
| 41 | C | -10.025215 | 2.286583  | 1.215182  |
| 42 | C | -11.375274 | 2.158328  | 1.287569  |
| 43 | C | -11.078521 | -2.217458 | -0.943460 |
| 44 | C | -9.728147  | -2.089629 | -1.013762 |
| 45 | C | 11.263172  | 0.032498  | 0.173292  |
| 46 | C | 12.046898  | -0.998013 | 0.771551  |
| 47 | C | 13.438304  | -0.842014 | 0.835613  |
| 48 | C | 14.050403  | 0.298609  | 0.324591  |

|    |   |            |           |           |
|----|---|------------|-----------|-----------|
| 49 | C | 13.292710  | 1.308209  | -0.261012 |
| 50 | C | 11.897988  | 1.198188  | -0.348321 |
| 51 | C | 10.025037  | -2.286345 | 1.216148  |
| 52 | C | 11.375116  | -2.158215 | 1.288380  |
| 53 | C | 11.078717  | 2.216629  | -0.944542 |
| 54 | C | 9.728321   | 2.088934  | -1.014680 |
| 55 | H | 2.714303   | -2.272237 | -0.255461 |
| 56 | H | -2.714522  | 2.272669  | -0.256035 |
| 57 | H | -5.295530  | 2.662249  | -0.201197 |
| 58 | H | 5.295304   | -2.662056 | -0.200680 |
| 59 | H | -1.453977  | -3.712669 | -0.233445 |
| 60 | H | -2.763125  | -2.946723 | 0.689024  |
| 61 | H | -2.787356  | -2.914897 | -1.095010 |
| 62 | H | 2.787262   | 2.916228  | -1.092905 |
| 63 | H | 1.453969   | 3.713152  | -0.230482 |
| 64 | H | 2.763201   | 2.946325  | 0.691163  |
| 65 | H | 7.335540   | -2.243494 | 0.969267  |
| 66 | H | 7.082699   | 1.551169  | -1.031115 |
| 67 | H | -7.335746  | 2.243928  | 0.968164  |
| 68 | H | -7.082604  | -1.551568 | -1.030624 |
| 69 | H | -14.038109 | 1.623132  | 1.289829  |
| 70 | H | -15.127979 | -0.402310 | 0.383910  |
| 71 | H | -13.779260 | -2.194442 | -0.655030 |
| 72 | H | -9.536288  | 3.170033  | 1.611862  |
| 73 | H | -11.974983 | 2.939747  | 1.742426  |
| 74 | H | -11.565416 | -3.101974 | -1.340584 |
| 75 | H | -9.126538  | -2.870402 | -1.466955 |
| 76 | H | 14.038017  | -1.623343 | 1.290188  |
| 77 | H | 15.128061  | 0.401562  | 0.383276  |
| 78 | H | 13.779475  | 2.193405  | -0.656333 |
| 79 | H | 9.536035   | -3.169566 | 1.613245  |
| 80 | H | 11.974768  | -2.939504 | 1.743537  |
| 81 | H | 11.565689  | 3.100911  | -1.342092 |
| 82 | H | 9.126771   | 2.869582  | -1.468165 |

---

## 8. References

1. L. Fu, P. Liu, R. Xue, X.-Y. Tang, J. Cao, Z.-F. Yao, Y. Liu, S. Yan and X.-Y. Wang, *Angew. Chem. Int. Ed.*, 2023, **62**, e202306509.
2. H. Li, F. Liu, X. Wang, C. Gu, P. Wang and H. Fu, *Macromolecules*, 2013, **46**, 9211.
3. O. P. Lee, A. T. Yiu, P. M. Beaujuge, C. H. Woo, T. W. Holcombe, J. E. Millstone, J. D. Douglas, M. S. Chen, and J. M. J. Fréchet, *Adv. Mater.*, 2011, **23**, 5359.
4. D. Liu, Z. He, Y. Su, Y. Diao, S. C. B. Mannsfeld, Z. Bao, J. Xu and Q. Miao, *Adv. Mater.*, 2014, **26**, 7190.
5. M. Li, C. An, T. Marszalek, X. Guo, Y.-Z. Long, H. Yin, C. Gu, M. Baumgarten, W. Pisula and K. Müllen, *Chem. Mater.*, 2015, **27**, 2218.
6. M. Zhu, S. Lv, Q. Wang, G. Zhang, H. Lu and L. Qiu, *Nanoscale*, 2016, **8**, 7738.
7. Y. He, J. T. E. Quinn, D. Hou, J. H. L. Ngai and Y. Li, *J. Mater. Chem. C*, 2017, **5**, 12163.
8. M. J. Kim, S. Choi, M. Lee, H. Heo, Y. Lee, J. H. Cho and B. Kim, *ACS Appl. Mater. Interfaces*, 2017, **9**, 19011.
9. F. Li, Y. Chen, C. Ma, U. Buttner, K. Leo and T. Wu, *Adv. Electron. Mater.*, 2017, **3**, 1600430.
10. S. Lee, C. Lee, H. Kim and Y. Kim, *J. Mater. Chem. C*, 2020, **8**, 15778.
11. C. Xiao, C. Li, F. Liu, L. Zhang and W. Li, *J. Mater. Chem. C*, 2020, **8**, 5370.
12. S. Kim, D. Lee, J. Lee, Y. Cho, S.-H. Kang, W. Choi, J. H. Oh and C. Yang, *Chem. Mater.*, 2021, **33**, 7499.
13. J. Park, C. Lee, T. Kim, H. Kim and Y. Kim, *Adv. Electron. Mater.*, 2021, **7**, 2000932.
14. H. Son, T. Kim, C. Lee, H. Kim and Y. Kim, *J. Mater. Chem. C*, 2022, **10**, 3951.
15. Y. Cho, T. Kim, W. Lee, H. Kim and Y. Kim, *J. Mater. Chem. C*, 2023, **11**, 2970.
16. Gaussian 09, Revision D.01, M. J. Frisch, G. W. Trucks, H. B. Schlegel, G. E. Scuseria, M. A. Robb, J. R. Cheeseman, G. Scalmani, V. Barone, B. Mennucci, G. A. Petersson, H. Nakatsuji, M. Caricato, X. Li, H. P. Hratchian, A. F. Izmaylov, J. Bloino, G. Zheng, J. L. Sonnenberg, M. Hada, M. Ehara, K. Toyota, R. Fukuda, J. Hasegawa, M. Ishida, T. Nakajima, Y. Honda, O. Kitao, H. Nakai, T. Vreven, J. A. Montgomery, Jr., J. E. Peralta, F. Ogliaro, M. Bearpark, J. J. Heyd, E. Brothers, K. N. Kudin, V. N. Staroverov, T. Keith, R. Kobayashi, J. Normand, K. Raghavachari, A. Rendell, J. C. Burant, S. S. Iyengar, J. Tomasi, M. Cossi, N. Rega, J. M. Millam, M. Klene, J. E. Knox, J. B. Cross, V. Bakken, C. Adamo, J. Jaramillo, R. Gomperts, R. E. Stratmann, O. Yazyev, A. J. Austin, R. Cammi, C. Pomelli, J. W. Ochterski, R. L. Martin, K. Morokuma, V. G. Zakrzewski, G. A. Voth, P. Salvador, J. J. Dannenberg, S. Dapprich, A. D. Daniels, O. Farkas, J. B. Foresman, J. V. Ortiz, J. Cioslowski, and D. J. Fox, Gaussian, Inc., Wallingford CT, 2013.
17. (a) A. D. Becke, *J. Chem. Phys.* 1993, **98**, 5648. (b) C. Lee, W. Yang, R. G. Parr, *Phys. Rev. B* 1988, **37**, 785. (c) T. Yanai, D. Tew, N. Handy, *Chem. Phys. Lett.* 2004, **393**, 51. (d) R. Ditchfield, W. J. Hehre, J. A. Pople, *Chem. Phys.* 1971, **54**, 724. (e) W. J. Hehre, R. Ditchfield, J. A. Pople, *Chem. Phys.* 1972, **56**, 2257. (f) P. C. Hariharan, J. A. Pople, *Theor. Chim. Acta.* 1973, **28**, 213.

## 9. NMR Spectra

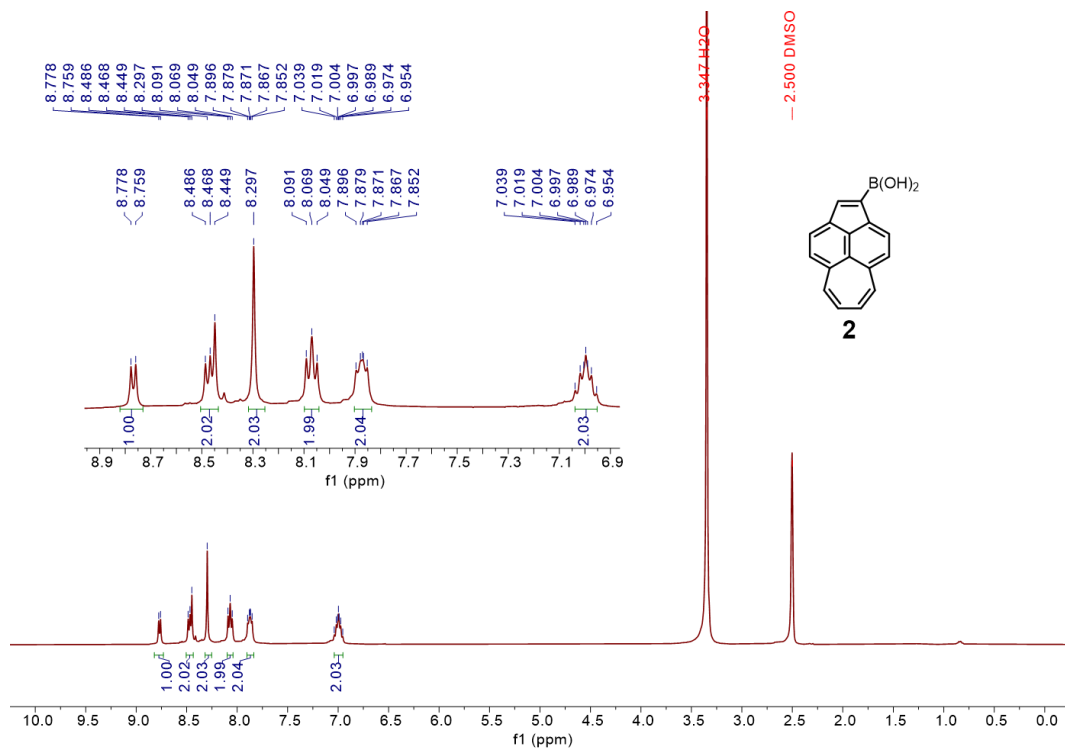

Figure S17. <sup>1</sup>H NMR spectrum of compound 2 (400 MHz, DMSO-*d*<sub>6</sub>, 298 K).

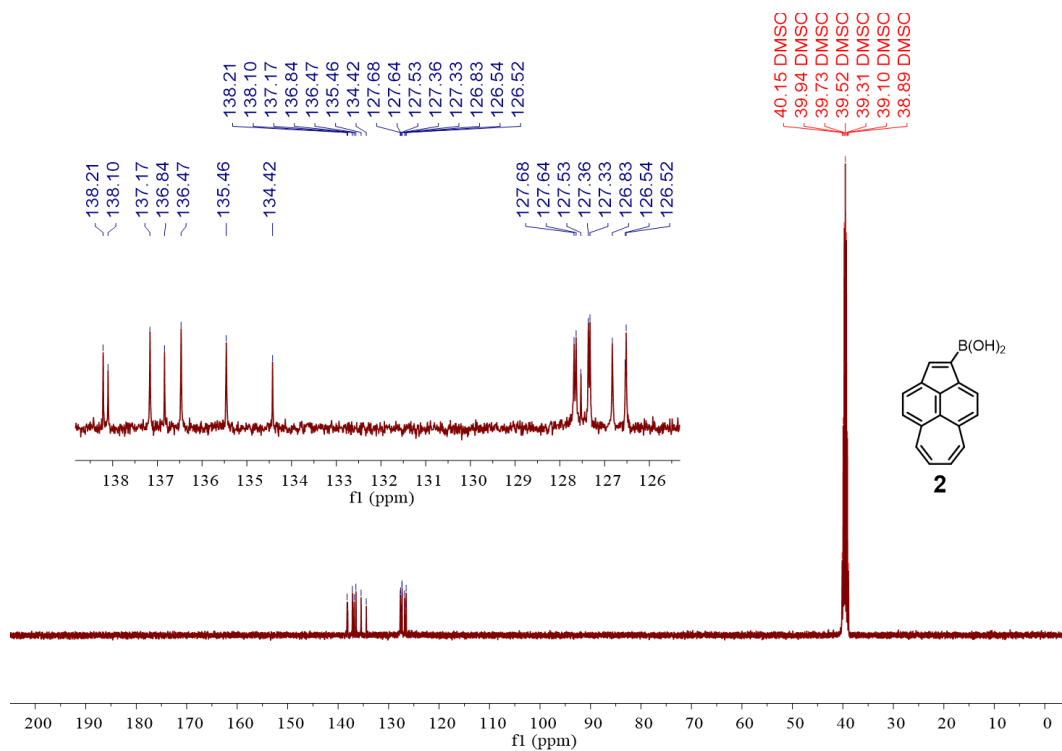

Figure S18. <sup>13</sup>C NMR spectrum of compound 2 (101 MHz, DMSO-*d*<sub>6</sub>, 298 K).

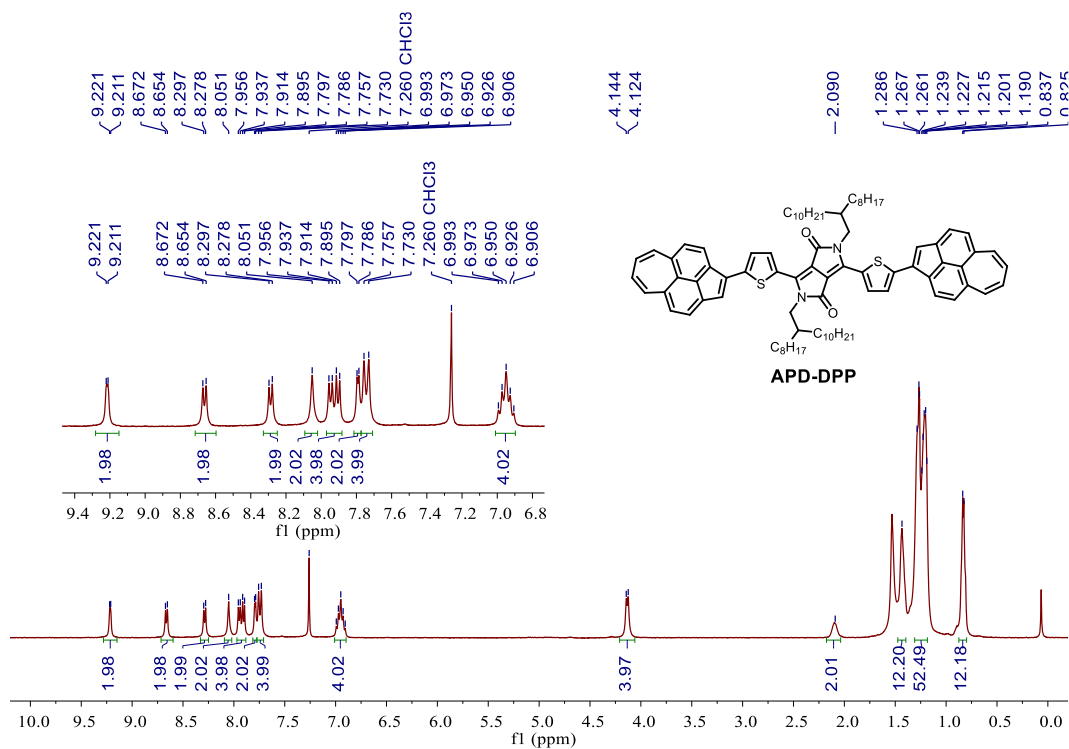

**Figure S19.** <sup>1</sup>H NMR spectrum of APD-DPP (400 MHz, CDCl<sub>3</sub>, 298 K).

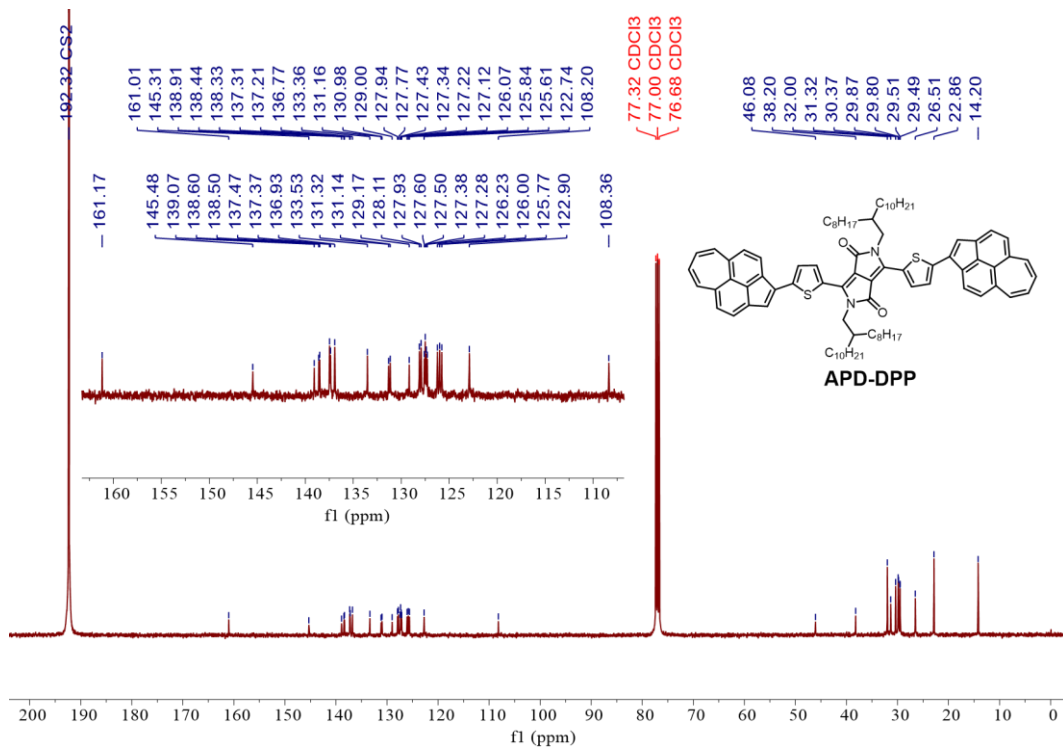

**Figure S20.** <sup>13</sup>C NMR spectrum of APD-DPP (101 MHz, CS<sub>2</sub>/CDCl<sub>3</sub>, 298 K).
